# Supplementary material for: Science in the cloud (SIC): A use case in MRI connectomics
Source: PubMed Central journal article supplement (PMC5467033; doi:10.1093/gigascience/gix013), 2017-03-07
Supplement: gix013_GIGA-D-16-00143_Revision_2.pdf [file gix013_GIGA-D-16-00143_Revision_2.pdf]

# Science In the Cloud (SIC): A use case in MRI Connectomics

Gregory Kiar<sup>1,2</sup>, Krzysztof J. Gorgolewski<sup>3</sup>, Dean Kleissas<sup>4</sup>, William Gray Roncal<sup>4,5</sup>,  
Brian Litt<sup>6,7</sup>, Brian Wandell<sup>3,8</sup>, Russel A. Poldrack<sup>3</sup>, Martin Wiener<sup>9</sup>, R. Jacob Vogelstein,  
Randal Burns<sup>5</sup>, Joshua T. Vogelstein<sup>1,2</sup>

Corresponding Author: Joshua T. Vogelstein [jovo@jhu.edu](mailto:jovo@jhu.edu)

## Abstract

Modern technologies are enabling scientists to collect extraordinary amounts of complex and sophisticated data across a huge range of scales like never before. With this onslaught of data, we can allow the focal point to shift from data collection to data analysis. Unfortunately, lack of standardized sharing mechanisms and practices often make reproducing or extending scientific results very difficult. With the creation of data organization structures and tools which drastically improve code portability, we now have the opportunity to design such a framework for communicating extensible scientific discoveries. Our proposed solution leverages these existing technologies and standards, and provides an accessible and extensible model for reproducible research, called "science in the cloud" (SIC). Exploiting scientific containers, cloud computing, and cloud data services, we show the capability to compute in the cloud and run a web service that enables intimate interaction with the tools and data presented. We hope this model will inspire the community to produce reproducible and, importantly, extensible results which will enable us to collectively accelerate the rate at which scientific breakthroughs are discovered, replicated, and extended.

## 1 Introduction

Neuroscience is currently in a golden age of data and computation. Through recent technological advances [1], experimentalists can now amass large amounts of high quality data across essentially all experimental paradigms and spatiotemporal scales; such data are ripe to reveal the principles of brain function and structure. In fact, many public datasets and open-access data hosting repositories are going online [2; 3].

Concurrent with this onslaught of data is a desire to run analyses, not just on data collected in a single lab, but also on other publicly available datasets. Various tools have been developed by the community which solve a wide variety of computational challenges on all types of data, enabling difficult scientific questions to be answered. With the ability to perform analyses often dependent only upon access to data and code resources, neuroscience is now more accessible, with a lower barrier to entry.

However, there is no tool or framework that enables research to be performed and communicated in a way that lends itself to easy extensibility, much less reproducibility. Currently, re-performing and extending published analyses whether through data or code is often unbearably difficult: (i) data may be closed-access; (ii) data may be organized in an ad hoc fashion; (iii) the code may be closed-source or undocumented; (iv) code may have been run with

1  
2  
3  
4 undocumented parameters and dependencies; (v) analyses may have been run with code  
5 compiled for specific hardware. These properties make validating and extending scientific  
6 claims challenging.

7  
8 A focus on reproducibility is already commonplace in a variety of disciplines. In genomics,  
9 Bioboxes [4] provide a framework for reproducible and interchangeable analysis containers,  
10 and tools are exploiting scalable computing solutions and being published with reproduction  
11 instructions (see: [5; 6]). Commentaries on reproducible research provide suggestions to re-  
12 searchers on how to tackle the challenges that are present in their scientific settings [7; 8].  
13 While these works have accelerated reproducibility and extensibility in their fields, the meth-  
14 ods proposed do not scale to the cloud or enable real-time interactivity, and have yet to be  
15 thoroughly applied to the burgeoning field of computational neuroscience.

16  
17 The notion of a universally web-viewable laboratory [9] is also growing in popularity, and  
18 many initiatives have been successful in contributing to this vision. In plant biology, Cy-  
19 Verse [10] provides infrastructure for tools, data, and education. In neuroscience, platforms  
20 such as LONI's Pipeline [11] and neuGRID [12] alleviate the burden of managing captive com-  
21 puting resources and integrating them with datastores, while NeuroDebian [13] provides quick  
22 and easy access to a variety of neuroimaging tools. Leveraging the NeuroDebian platform, NI-  
23 TRC has encouraged a transition to the cloud by releasing an Amazon Machine Image (AMI)<sup>1</sup>  
24 preloaded with commonly used packages. In parallel, many groups have strived to breach the  
25 frontier through such efforts as developing sophisticated resource estimation-based deploy-  
26 ment strategies [14], and these have shown the great potential for a cloud-based approach  
27 to neuroimaging [15]. Each of these projects has made valuable contributions to the progress  
28 towards accessibility and portability of neuroscience research.

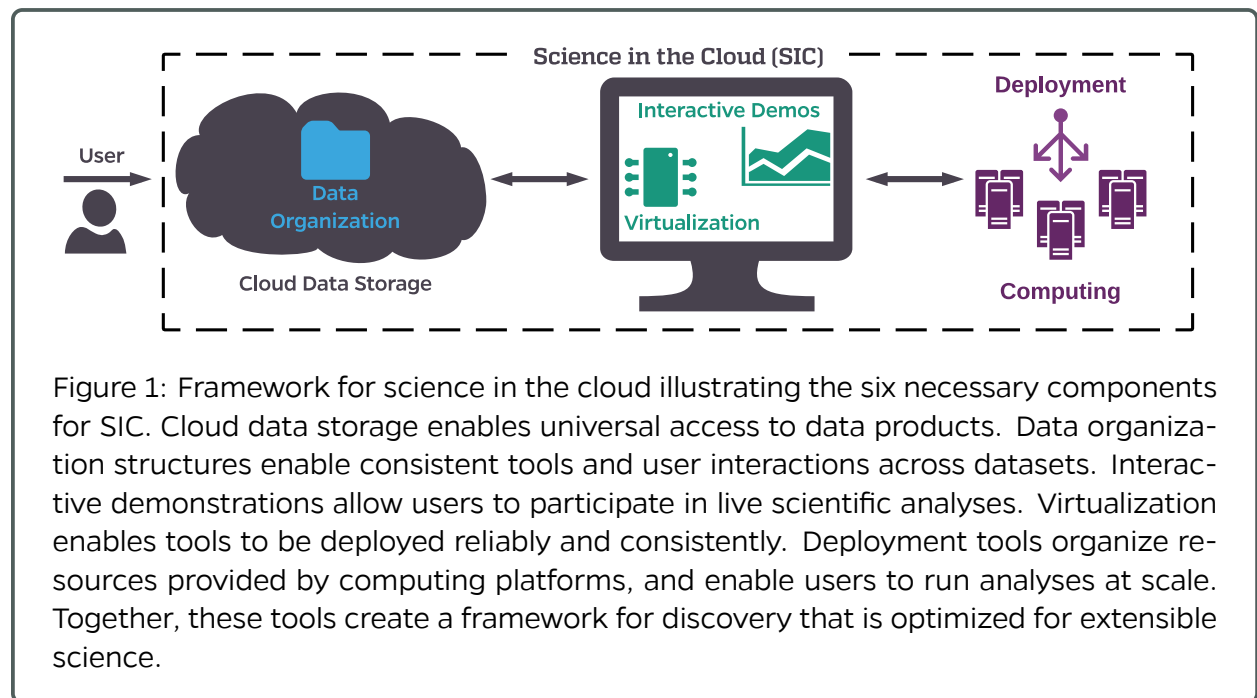

Figure 1: Framework for science in the cloud illustrating the six necessary components for SIC. Cloud data storage enables universal access to data products. Data organization structures enable consistent tools and user interactions across datasets. Interactive demonstrations allow users to participate in live scientific analyses. Virtualization enables tools to be deployed reliably and consistently. Deployment tools organize resources provided by computing platforms, and enable users to run analyses at scale. Together, these tools create a framework for discovery that is optimized for extensible science.

58  
59 We propose a solution to these gaps in the form of a framework which leverages publicly  
60 documented and deployable cloud instances with specific pipelines installed and configured

1  
2  
3  
4 to extend published findings: an implementation we simply term "science in the cloud," or,  
5 SIC (Latin for "thus was it written"). SIC instances have several fundamental components, as  
6 summarized in Figure 1. To address data access, we put data in the cloud. To address data or-  
7 ganization, we utilize recently proposed data standards. To address closed source and undoc-  
8 umented code, we generate open-source code and interactive demonstrations. To address  
9 software and hardware dependencies, we utilize virtualization, automated deployment, and  
10 cloud computing. SIC puts these pieces together to create a computing instance launched  
11 in the cloud, designed not only for generating reproducible research, but also enabling easily  
12 accessible and extensible science for everyone. SIC is designed to minimize the bottlenecks  
13 between publication and novel discoveries; leveraging the experience of the community, we  
14 propose a solution for transitioning to a universal, and "future-proof," deployment of software  
15 to the cloud.

16 We introduce and document an example use case of SIC with the ndmg pipeline, thus  
17 entitled SIC:ndmg. We have developed a capability which enables users to launch a cloud in-  
18 stance and run a container which performs an analysis of a cohort of structural and diffusion  
19 magnetic resonance imaging scans by (i) downloading the required data from a public repos-  
20 itory in the cloud, (ii) fully processing each subject's data to estimate a connectome for each  
21 subject's associated graph statistics, and, optionally, (iii) plot quality control figures of various  
22 multivariate graph statistics.

## 2 Methods

23 There are six key decisions which must be made when following SIC: data storage, data orga-  
24 nization, interactive demonstrations, virtualization, deployment, and computing. The selec-  
25 tion made for each of these components will have a significant impact on available selections  
26 for the others. The final product will be a highly interdependent network of tools and data.  
27 Table 1 shows a summary of the selections made for each of the criteria enumerated in the  
28 previous section with rationales for the decisions. In general, the tools selected were those  
29 which provided the most command-line/Application Programming Interface (API) support for  
30 their service and had the most complete documentation or online support community, en-  
31 abling setup with relative ease.

32  
33 **Cloud Data Storage** There are several options when storing data in a publicly accessi-  
34 ble location, such as a cloud storage service or public repositories. Depending on the nature  
35 of the data being stored, different concerns (such as privacy) must be satisfied. For instance,  
36 sensitive data (i.e. not anonymized/de-identified) requires authentication for access, whereas  
37 de-identified data does not. It is our recommendation to host de-identified data in the cloud  
38 and store linking metadata privately on HIPPA (or equivalent) compliant organization datas-  
39 tores. Researchers who may not wish to release their data prior to publication are encouraged  
40 to store their data with secure protocols. The datastore should also be accessible through an  
41 API, or another interface enabling developers to access the data programmatically. Depend-  
42 ing on the desired organization, autonomy is also a valuable feature, affording the developer  
43 full control on how the data is stored, as opposed to working within the confines of an exist-  
44 ing infrastructure. The type of virtualization (described below) used may also influence the

1  
2  
3  
4  
5  
6  
7  
8  
9  
10  
11  
12  
13  
14  
15  
16  
17  
18  
19  
20  
21  
22  
23  
24  
25  
26  
27  
28  
29  
30  
31  
32  
33  
34  
35  
36  
37  
38  
39  
40  
41  
42  
43  
44  
45  
46  
47  
48  
49  
50  
51  
52  
53  
54  
55  
56  
57  
58  
59  
60  
61  
62  
63  
64  
65

types of shared datastores which will be natively compatible with the application. Considering the above, Amazon's S3 service was used in this SIC implementation because it satisfied all of these requirements. While Google's Cloud Engine or Microsoft Azure also satisfy these requirements, the decision to use S3 was made based upon our existing domain knowledge and familiarity with each of these systems.

**Data Organization** The newly publicly-available data then needs to be organized in accordance with a data specification which enables users to navigate the repository successfully. Such standards include both file formats, which can be interpreted by programs, as well as folder organizations, which enable grouping of data by subject, observation, type, etc. Depending on the modality of data being used, there are different structures which can be adopted. In the case of MRI, the BIDS [16] specification is a well-documented and community-developed standard which is intuitive and allows data to be both easily readable by humans and navigated by programs. Organizations such as "Neurodata without Borders" [17] would serve as additional options for physiology data, but are unsuitable for this application. Formats such as MINC [18] focus heavily on metadata management but less

Table 1: There are six key components which must be selected for SIC. **Bold** indicates the selections made here, with their positive and negative qualities compared to some alternatives.

| Hurdles               | Available Tools                                                               | Pros of Selection                       | Cons of Selection                      |
|-----------------------|-------------------------------------------------------------------------------|-----------------------------------------|----------------------------------------|
| 1) Data Storage       | <b>S3</b> , Dropbox, Google Drive                                             | API, pay-by-usage                       | requires familiarity with Amazon tools |
| 2) Data Organization  | <b>BIDS</b> [16], NWB [17], MINC [18]                                         | documented, validator, active community | new, not yet fully adopted             |
| 3) Interactive demo's | <b>Jupyter</b> , R Notebook, Shiny                                            | versatile, accessible                   | optimized for Python                   |
| 4) Virtualization     | <b>Docker</b> , Virtualbox [19], VMware [20]                                  | lightweight, self-documented            | --                                     |
| 5) Deployment         | <b>Batch/ECS</b> , Kubernetes [21], MyBinder [22], CBRAIN [23], Nextflow [24] | no additional dependencies              | restricted to Amazon's cloud           |
| 6) Computing          | <b>EC2</b> , Google Compute Engine [25], Microsoft Azure [26]                 | scalable, flexible                      | requires technological expertise       |

1  
2  
3  
4 on file hierarchy, making them useful though not fully sufficient for this application. Though  
5 some standards may consider securely handling identifying information, we recommend only  
6 storing de-identified data publicly to avoid possible security risks.  
7  
8

9  
10 **Interactive Demonstrations** To encourage use of data and the tools used to analyze it,  
11 interactive demonstrations that enable users to visualize and work with some subset of the  
12 data are extremely valuable. Various programming languages have different types of demon-  
13 stration environments available which either enable full interactivity or are pre-compiled to  
14 display code and results. A popular tool for interactive development and deployment of  
15 Python code is Jupyter, and thus was the tool used here. The popularity of this tool hope-  
16 fully increases the average user's familiarity with the interface, lowering the barrier to entry  
17 for interacting with SIC:ndmg. If a developer is more familiar with another programming lan-  
18 guage, there is no particular reason why one would select Jupyter over an equivalent package  
19 in R, such as R Notebook.  
20  
21  
22

23  
24 **Virtualization** Developing and distributing virtualized environments containing all neces-  
25 sary code products guarantees consistent dependencies and application setup, and therefore  
26 minimizes user effort to obtain expected performance. These virtual environments should be  
27 able to be deployed on any operating system and have minimal hardware-dependent code.  
28 A key desiderata is that the virtualization system minimizes unnecessary overhead for the  
29 application. Though it does not affect run-time performance, a repository of public machine  
30 images is an attractive feature for this model as it enables sharing configurations. Docker [27]  
31 was chosen because it satisfies these practical requirements, and the accessibility of Docker  
32 Hub enables images to be quickly found and deployed. Virtual machines such as those created  
33 in Virtual Box [19] or VMware [20] provide lots of range in terms of operating systems which  
34 can be launched and allow native access to the machine through a GUI. However, though  
35 these are great features, they are unnecessary for this application. An additional attractive  
36 feature of Docker is that translating a README file (which enumerates dependencies or in-  
37 stallation instructions) to a Dockerfile forces developers to improve their documentation and  
38 increases the useability of their tool. Though this is certainly extra work for the developer,  
39 the process requires only knowledge of the documented Docker schema and the editing of  
40 plain-text files, which we believe to be a relatively low cost to the developer.  
41  
42  
43  
44  
45  
46

47 **Deployment** Deployment platforms allow users to define a specific set of instructions that  
48 can be launched on a single machine or multiple machines simultaneously. In physical hard-  
49 ware configurations, a cluster's scheduler would play this role; in the cloud, such tools are  
50 able to take advantage of computing resources across different locations and services, and  
51 enable scaling with the amount of processing required. Middleware such as Kubernetes [21],  
52 Tutum<sup>2</sup>, or Nextflow [24] can enable a user to distribute their jobs across a cluster existing in  
53 different computing environments (i.e. separate clouds). When using a single cloud, such as  
54 Amazon or Google, native applications support managing resources efficiently. In the case  
55 of SIC:ndmg, we elected to deploy entirely in Amazon's cloud; therefore, we used Amazon's  
56 Batch to launch the pipeline distributed across multiple computing nodes, and Amazon's ECS  
57 to deploy a distributed and scalable SIC service. Tools such as CBRAIN [23], LONI [11], and  
58  
59  
60  
61

1  
2  
3  
4 MyBinder [22] also enable distributed deployment of code, but are more specialized in the  
5 requirements of the tools and services that can be launched and are thus more restrictive.  
6  
7

8 **Computing** Cloud computing services enable users to launch customized machines with  
9 specific hardware configurations and specifications, making them versatile for different va-  
10 rieties and scales of analyses. The more general the hardware that can be used, the more  
11 accessible the tool is for a user to adapt and use in their own environment. Selecting the  
12 commercial cloud for deployment as opposed to data center resources enables greater ac-  
13 cessibility and transparency to users, is more scalable, and enables parallel jobs to be run  
14 in completely isolated resources. Cloud deployments also provide consistent performance  
15 across nodes, and have a much lower start-up cost than utilizing local computing resources.  
16 Since there were no specific hardware requirements in this application, and there existed pre-  
17 vious in-house experience with the service, Amazon's EC2 was selected in this usecase. The  
18 benefit of using EC2 is that deploying code at different scales and locations is trivially ex-  
19 tendable, so implementations can be easily taken from prototype to deployment. Amazon's  
20 cloud enables launching computing resources based on AMIs with preinstalled dependencies,  
21 increasing the flexibility of the processes which can be launched.  
22  
23

24 Further details of our specific implementation and methods are provided in Appendix A.  
25  
26  
27  
28

## 29 **3 Results**

30  
31  
32 We demonstrate a working example of SIC, SIC:ndmg. The ndmg pipeline [28] is an open-  
33 source, scalable pipeline for human structural connectome estimation from diffusion and  
34 structural MR images (collectively referred to hereafter as "multimodal MRI", or M3RI for brevity).  
35 The result is a portable and easily extensible tool for scalable connectome generation. A live  
36 demonstration is presented that enables reader interaction with the pipeline at the cost of a  
37 simple URL click, and data products of the tool are presented in both the context of `repro-  
38 ducibility` and `extensibility.` This tool enables quantitative structural analyses of the human  
39 brain to be performed on populations of M3RI scans, and can lead to discoveries of the rela-  
40 tionship between brain connectivity and neurological disease.  
41  
42  
43  
44

### 45 **3.1 Neuroscience as a Service**

46  
47 The analysis transforms "raw" M3RI data into graphs. Kiar et al., (in preparation) describes the  
48 pipeline in detail; here we provide a brief overview. The pipeline (Figure 2) consists of four  
49 main steps: registration, tensor calculation, tractography, and graph generation. Note that  
50 the choices below are made for expediency and simplicity; other choices might be beneficial  
51 depending on context. Table 2 summarizes the duration and cost of each step for a given  
52 dataset processed and stored in the cloud.  
53  
54

55 Registration in ndmg is performed in several stages using FSL [29]. First, the diffusion im-  
56 age is self-aligned and noise-corrected using the `eddy_correct` function. Second, the trans-  
57 form is computed which aligns the B0 volume of the diffusion image to the structural scan  
58 using `epi_reg`. Third, the transform between the structural image and a reference atlas is  
59 computed with `f1irt`. Finally, the transforms are combined and applied to the self-aligned  
60  
61  
62

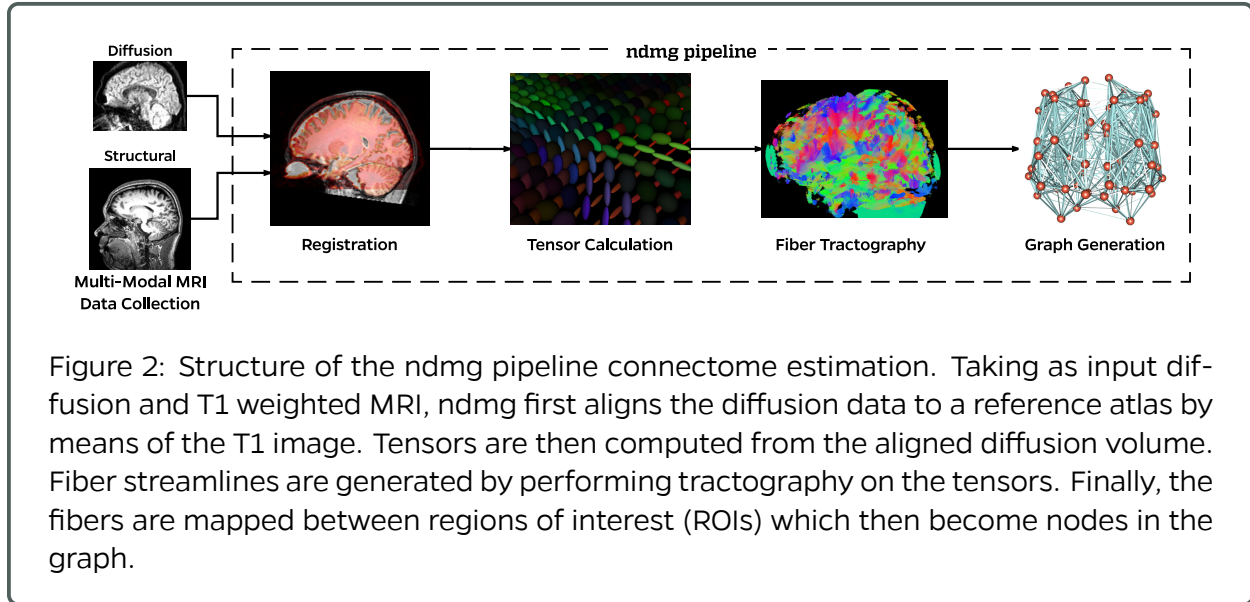

diffusion image. The tensor calculation and tractography steps are performed with the DiPy package [30]. A simple tensor model fits a 6-component tensor to the image, and deterministic tractography with the EuDx algorithm is run, producing a set of streamlines. Graph generation takes as input the fiber streamlines, and maps them to regions of interest (ROIs) defined by a pre-built parcellation (such as those packaged with FSL or generated with brain segmentation algorithms) and returns an ROI-wise connectome. An edge is added to the graph for each pair of nodes along a given fiber. The final step is computing (multivariate) graph statistics on the estimated connectomes. The statistics computed are [31]: number

Table 2: Approximate cost and time breakdown per subject of the ndmg pipeline running in Amazon EC2 with data stored in S3 and computation with m4.large machines at spot pricing of \$0.0135 per hour (Accessed on 2017/01/04). The values were obtained by processing data from the NKI1 dataset with 40 sessions. The reader should note that Amazon S3 data I/O is not free, as it may appear, but is simply inexpensive for data this size.

| Operation          | Time per session (min) | Cost per session (1/100 USD) |
|--------------------|------------------------|------------------------------|
| data storage       | --                     | 1.048/month                  |
| data I/O           | --                     | 0.000                        |
| <b>Total</b>       | <b>--</b>              | <b>1.048/month</b>           |
| registration       | 25                     | 0.563                        |
| tensor calculation | 2                      | 0.045                        |
| fiber tractography | 5                      | 0.112                        |
| graph generation   | 30                     | 0.675                        |
| <b>Total</b>       | <b>62</b>              | <b>1.395</b>                 |

of non-zero edges, degree distribution, eigen sequence, locality-statistic 1, edge weight distribution, clustering coefficient, and betweenness centrality. These statistics provide insight into the structure of the brain graphs, and provide a low-dimensional feature by which the graphs for different scans can be compared to one another. To provide a preliminary quality control step, we plot the graph statistics [31] for each graph (Figure 4).

## 3.2 Live Demonstration

A demonstration of SIC:ndmg is available at <http://scienceinthe.cloud/>. This SIC instance is deployed via ECS on an Amazon micro-instance which is very affordable, so it can stay on-line indefinitely with little cost or maintenance (\$100/year). This instance is running a Jupyter server which contains the demonstration notebook, `sic_ndmg.ipynb`. Launching the notebook pulls up an interface which resembles that of Figure 3A.

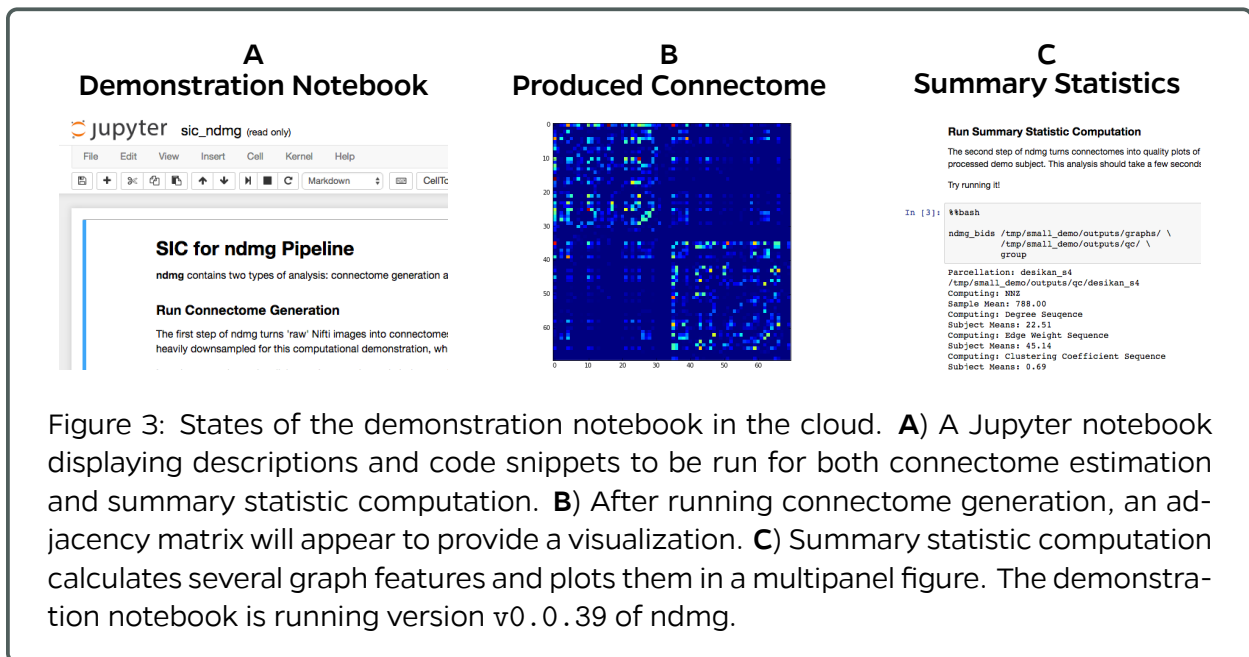

Figure 3: States of the demonstration notebook in the cloud. **A)** A Jupyter notebook displaying descriptions and code snippets to be run for both connectome estimation and summary statistic computation. **B)** After running connectome generation, an adjacency matrix will appear to provide a visualization. **C)** Summary statistic computation calculates several graph features and plots them in a multipanel figure. The demonstration notebook is running version `v0.0.39` of ndmg.

For demonstration purposes, a downsampled subject is used in this notebook which reduces analysis time from  $\sim 1$  hr/subject/core to  $\sim 3$  min/subject/core. The ndmg pipeline has two levels of analysis: graph generation and summary statistic computation. Graph generation is the process of turning diffusion and structural MR images into a connectome (i.e. brain graph), and the summary statistic computation produces a graph of several graph features on each produced connectome and plots them together. Running through the notebook (Figure 3A) chronologically will produce the brain graph, display the graph (Figure 3B), compute summary statistics (Figure 3C), and then plot the statistics.

## 3.3 Reproducible Results

In addition to the live demonstration, SIC:ndmg was used to process the NKI1 [32] dataset consisting of 40 M3R scans. Instructions on setting up a cluster and running this analysis



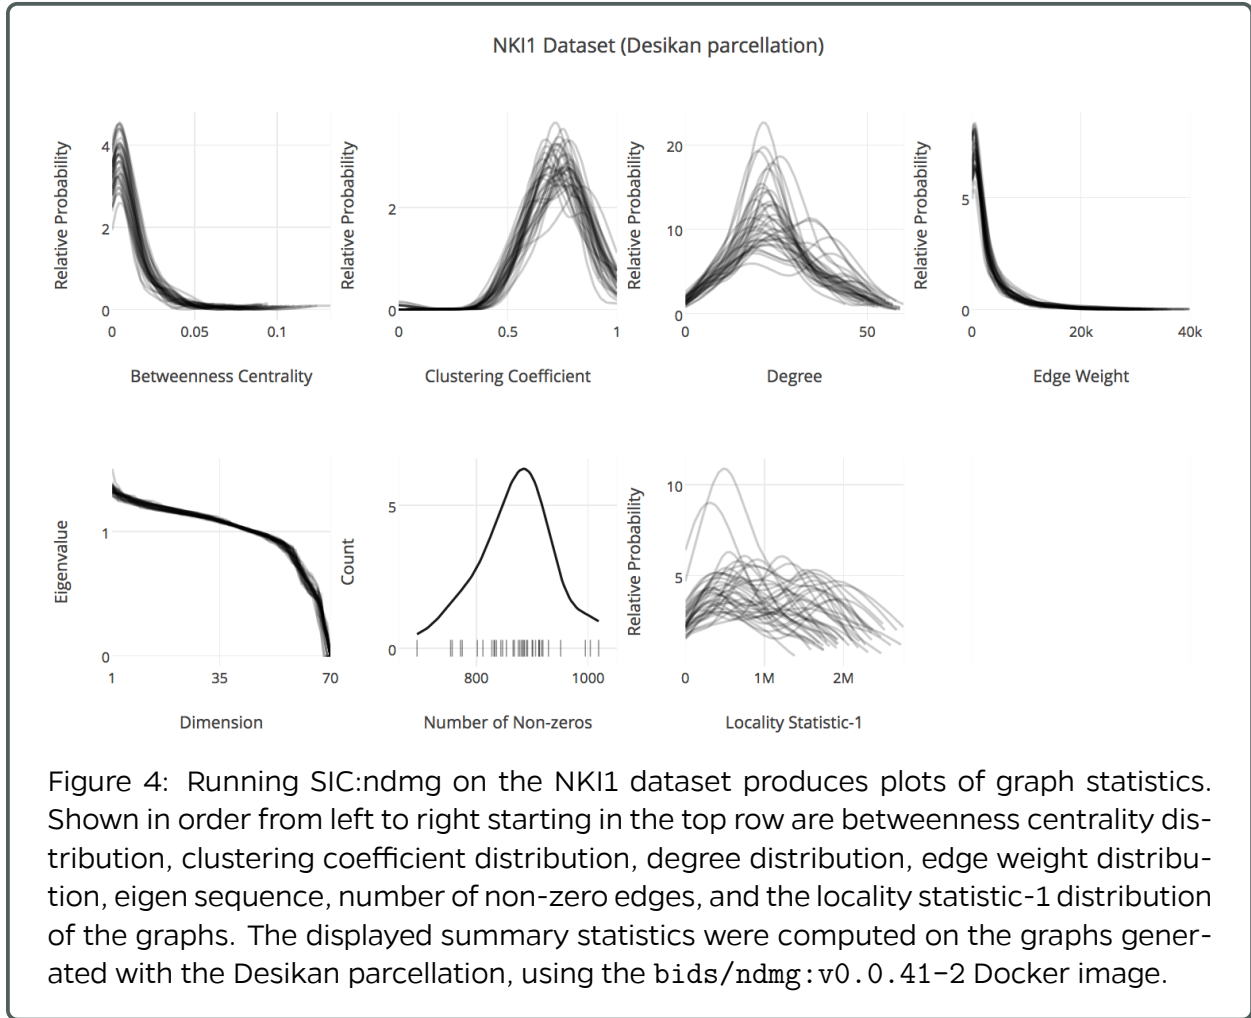

can be found in Appendix A. The NKI1 dataset is made publicly available through CORR [32], but has been organized in accordance to the BIDS [16] specification and re-hosted on our public S3 bucket, `mrneurodata`. The dataset consists of MPRAGE, DWI, and fMRI scans, where each subject has been scanned at least twice for each modality. More information about the subjects in this dataset and the scanning parameters used can be found on the CORR website<sup>3</sup>.

Running the Docker-hosted scientific container `bids/ndmg:v0.0.41-2` on the NKI1 dataset produced Figure 4, costing under \$1, as is summarized in Table 2. Table 3 summarizes the parameters used as inputs to SIC:ndmg to generate the graphs. Figure 4 provides insight into the variance of the dataset through a variety of different metrics. According to published work on these summary statistics [31], this dataset and pipeline combination produces expected results. A key benefit of this visualization is that it has high information density, showing us distributions for a variety of features for a large number of graphs, as opposed to more common 1-dimensional features [33]. This figure was produced by the parameters summarized in Table 4.

The demonstration in the previous section executed the exact same pipeline that was used to generate Figure 4. The sole difference between execution of the demonstration and this

Table 3: Command line arguments for connectome generation

| Parameter             | Value            |
|-----------------------|------------------|
| data input directory  | /data/raw        |
| data output directory | /data/connectome |
| analysis level        | participant      |
| bucket name           | mrneurodata      |
| path on bucket        | NKI24            |

implementation -- aside from the data being processed -- is the specific Docker container being used. The reason for this difference is that the demonstration is required to run as a web service, so additional packages and setup are required.

Table 4: Command line arguments for summary statistic computation.

| Parameter             | Value                   |
|-----------------------|-------------------------|
| data input directory  | /data/connectome/graphs |
| data output directory | /data/qc                |
| analysis level        | group                   |

### 3.4 Extensible Results

A crucial property of SIC is the simplicity it affords users to perform extensible science. Extensibility in this context can occur on several levels, including changing or adding (i) data, (ii) analyses, or (ii) visualizations. Figure 5 shows an example of such extensibility. A different dataset, the KKI2009 dataset [34], was processed using modified code, plotting the degree distribution on a log scale, with an additional plot added for cumulative variance analysis. The container used for this analysis on Docker hub is `bids/ndmg:v0.0.41-2`. Further details and instructions about how to extend SIC:ndmg specifically are available in Appendix B.

## 4 Discussion

Though the exemplar application used to demonstrate the value of SIC was the one-click ndmg pipeline, the framework is not restricted to this tool, or even one-click tools at all. For instance, a recent manuscript presented the notion of BIDS Apps [35]: containerized neuroimaging applications which operate on data stored in the BIDS data structure. These apps<sup>4</sup> enable complex workflows to be executed, often taking in configuration files to allow for complicated parameter sets to be delivered more conveniently than via the command line. Such containers are a terrific usecase for SIC, and can be seamlessly interchanged with one another in a given deployment. SIC can use tools such as FreeSurfer or ANTs in certain process-

1  
2  
3  
4  
5  
6  
7  
8  
9  
10  
11  
12  
13  
14  
15  
16  
17  
18  
19  
20  
21  
22  
23  
24  
25  
26  
27  
28  
29  
30  
31  
32  
33  
34  
35  
36  
37  
38  
39  
40  
41  
42  
43  
44  
45  
46  
47  
48  
49  
50  
51  
52  
53  
54  
55  
56  
57  
58  
59  
60  
61  
62  
63  
64  
65

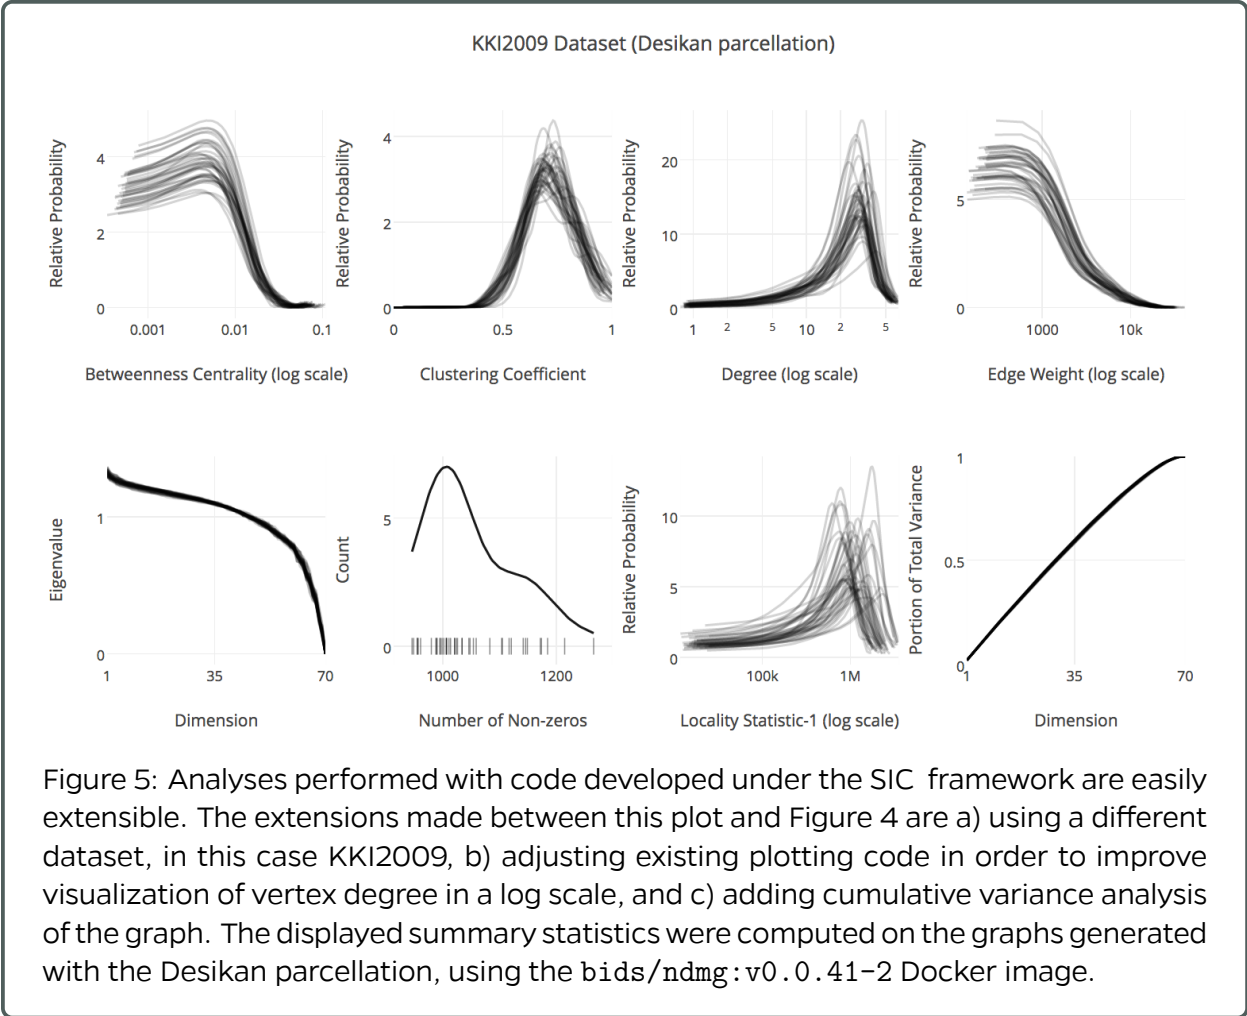

Figure 5: Analyses performed with code developed under the SIC framework are easily extensible. The extensions made between this plot and Figure 4 are a) using a different dataset, in this case KKI2009, b) adjusting existing plotting code in order to improve visualization of vertex degree in a log scale, and c) adding cumulative variance analysis of the graph. The displayed summary statistics were computed on the graphs generated with the Desikan parcellation, using the `bids/ndmg:v0.0.41-2` Docker image.

ing steps with no software changes. Developing pipelines within the SIC framework enhances their reproducibility and the extensibility of publications using them, potentially increasing their scientific impact.

The SIC framework does not need to be confined to monolithic tools and containers. With further work, this concept can be integrated into a platform in which users are able to launch a variety of analyses on a variety of datasets. The self-documenting and reproducible web-calls which launch cloud containers performing computational tasks have potential to drastically improve the feedback loop between a scientist and their peers. This enables analyses to be easily replicated and refined, thus expediting scientific discovery. Tools such as Binder [22] accomplish this beautifully for Python, but the benefits of SIC are that this model can be applied not only to any containerizable application, but big data as well.

The distinct advantage of using Docker for virtualization as opposed to virtual machines is the lack of both computational and data overhead. Though virtual machines can be used for pipeline deployment, they are based upon hard drive files which can bloat the host system. Virtual machines also require computational overhead to distribute processes to the host system, which Docker interfaces with directly. In many applications, virtual machines

1  
2  
3  
4 are a wise or even necessary tool of choice, though when the sole objective is the execution  
5 of a pipeline followed by termination of the environment, the benefits of minimal overhead  
6 often outweigh those of the additional features which may be available through virtual ma-  
7 chines. Tools which aid in the deployment of virtualized environments such as Vagrant can be  
8 paired with a method of virtualization, whether Docker or otherwise, and they provide further  
9 documentation describing the process for launching an environment containing a given tool  
10 for execution.  
11

12  
13 The selections made in SIC:ndmg regarding the six technological components highlighted  
14 above were chosen based on what the authors perceived to be most widely used and sup-  
15 ported in the active online community. Other tools enumerated in Table 1 provide alterna-  
16 tive features which can make SIC instances appear and run quite differently when developed  
17 separately, but ultimately provide a comparable experience for the user. For instance, the  
18 decision to store data independently from a public repository (such as NITRC [36], LONI's  
19 IDA [37], LORIS [38], or ndstore [39]) leaves the onus of data organization on the developer  
20 rather than the repository, but in either case the user is able to access the data they need.  
21 This decision in particular was made so that the developer would have complete control over  
22 their data and implementation. However, hosting data within an environment such as those  
23 listed would have the advantage of enabling use of the infrastructure already built to support  
24 these platforms, such as performing meta-analyses and tracking provenance of the data it-  
25 self, and is an exciting avenue for future work. While functionality for deploying in parallel  
26 to the cloud was developed with Amazon's Batch directly for interfacing with their cloud, al-  
27 ternative deployment tools such as Kubernetes are attractive options, because they provide  
28 clear visualizations of running processes and process versions and would enable SIC to deploy  
29 pipelines across multiple computing clouds or clusters. Deployments making use of local dat-  
30 acenters as opposed to the cloud are identical in execution to those in the cloud, once Docker  
31 (or the virtualization engine of choice) is installed on the shared resources and a scheduling  
32 framework is available.  
33

34  
35 This manuscript proposes a model for extensible and accessible development that did  
36 not strain those who have already been developing or using reproducible tools, but rather  
37 enhanced their ability to do so. Domain knowledge, such as that of Docker, is not uniform  
38 across disciplines, and this may discourage developers from complying with this methodol-  
39 ogy. However, it is our belief that the proposed framework does not require additional devel-  
40 opment beyond what already goes into creating and using a reproducible tool. For instance,  
41 in the case of Docker, a Dockerfile simply documents the instructions which are to be exe-  
42 cuted upon booting a brand-new computer and installing a given tool and its dependencies.  
43 Documenting this process is essential for developers, and many tools contain a README file de-  
44 scribing the installation process. Once a Docker container exists, the process of re-executing  
45 and testing these instructions often requires far fewer keystrokes and ambiguity in the in-  
46 structions is eliminated. There are certainly start-up costs when transitioning to new tools  
47 such as virtualization platforms, but it is our view that the gained transparency and portabil-  
48 ity within SIC greatly outweighs the costs.  
49

50  
51 In summary, the SIC framework presents a standard of reliability and extensibility for sci-  
52 entific data distribution and analysis. SIC is an important building block towards a global sci-  
53 entific community, regardless of scientific discipline, and provides a practical implementation  
54 of the idiom that science is done by "standing on the shoulders of giants."  
55  
56

## Acknowledgements

This project stemmed from a sequence of three different initiatives. First, the Global Brain Workshop<sup>5</sup> brought together a collection of 60+ scientists who converged on a set of grand challenges for global brain sciences. There was universal agreement that a global framework [40] would be instrumental in transitioning neuroscience from a data deluge to a data delight. Then, at the Open Data Ecosystem for Neurosciences<sup>6</sup>, the working group on reproducibility decided that an example of a reproducible and extensible framework would be highly informative for ourselves and the greater community. Finally, the inaugural Stanford Center for Reproducible Neuroscience Coding Sprint<sup>7</sup> brought leaders in neuroimaging from around the globe to chart a path forward with standardizing a process for containerizing both open- and closed-source tools [35].

## Affiliations

<sup>1</sup>Department of Biomedical Engineering, Johns Hopkins University, Baltimore, MD, USA.

<sup>2</sup>Center for Imaging Science, Johns Hopkins University, Baltimore, MD, USA.

<sup>3</sup>Department of Psychology, Stanford University, Stanford, CA, USA.

<sup>4</sup>Johns Hopkins University Applied Physics Lab, Columbia, MD, USA.

<sup>5</sup>Department of Computer Science, Johns Hopkins University, Baltimore, MD, USA.

<sup>6</sup>Department of Bioengineering, University of Pennsylvania, Philadelphia, PA, USA.

<sup>7</sup>Department of Neurology, Hospital of the University of Pennsylvania, Philadelphia, PA, USA.

<sup>8</sup>Center for Cognitive and Neurobiological Imaging, Stanford University, Stanford, CA, USA.

<sup>9</sup>Department of Psychology, George Mason University, Fairfax, VA, USA.

## Availability of supporting source code and requirements

**Project name** Science in the Cloud

**Project home page** <http://scienceinthe.cloud>

**Operating system(s)** Platform independent

**Programming languages** Python, Docker, Bash

**Other requirements** Docker, AWS credentials

**License** Apache 2.0

## Availability of Supporting Data

Snapshots of code can be found in the GigaScience repository, GigaDB [41].

## Declarations

**Competing Interests** The authors declare no competing interests in this manuscript.

**Abbreviations** Amazon Machine Image (AMI), Application Programming Interface (API), Brain Imaging Data Structure (BIDS), Multimodal Magnetic Resonance Imaging (M3RI), Neurodata Without Borders(NWB), Science in the Cloud (SIC)

**Funding** The authors would like to graciously thank: NIH, NSF, DARPA, IARPA, Johns Hopkins University, and the Kavli Foundation for their support. Specific award information can be found at <https://neurodata.io/about>.

## References

- [1] S. Grillner et al., "Worldwide initiatives to advance brain research," *Nature neuroscience*, vol. 19, no. 9, pp. 1118--1122, 2016.
- [2] R. A. Poldrack and K. J. Gorgolewski, "Making big data open: data sharing in neuroimaging," *Nature neuroscience*, vol. 17, no. 11, pp. 1510--1517, 2014.
- [3] L. G. Kini, K. A. Davis, and J. B. Wagenaar, "Data integration: Combined imaging and electrophysiology data in the cloud," *NeuroImage*, vol. 124, pp. 1175--1181, 2016.
- [4] P. Belmann, J. Dröge, A. Bremges, A. C. McHardy, A. Sczyrba, and M. D. Barton, "Bioboxes: standardised containers for interchangeable bioinformatics software," *GigaScience*, vol. 4, no. 1, p. 1, 2015.
- [5] A. Bremges, I. Maus, P. Belmann, F. Eikmeyer, A. Winkler, A. Albersmeier, A. Pühler, A. Schlüter, and A. Sczyrba, "Deeply sequenced metagenome and metatranscriptome of a biogas-producing microbial community from an agricultural production-scale biogas plant," *GigaScience*, vol. 4, no. 1, p. 1, 2015.
- [6] M. E. Aranguren and M. D. Wilkinson, "Enhanced reproducibility of sadi web service workflows with galaxy and docker," *GigaScience*, vol. 4, no. 1, p. 1, 2015.
- [7] S. R. Piccolo, A. B. Lee, and M. B. Frampton, "Tools and techniques for computational reproducibility," *bioRxiv*, p. 022707, 2015.
- [8] R. D. Peng, "Reproducible research in computational science," *Science*, vol. 334, no. 6060, pp. 1226--1227, 2011.
- [9] G. B. Frisoni, A. Redolfi, D. Manset, M.-É. Rousseau, A. Toga, and A. C. Evans, "Virtual imaging laboratories for marker discovery in neurodegenerative diseases," *Nature Reviews Neurology*, vol. 7, no. 8, pp. 429--438, 2011.
- [10] U. K. Devisetty, K. Kennedy, P. Sarando, N. Merchant, and E. Lyons, "Bringing your tools to cyverse discovery environment using docker," *F1000Research*, vol. 5, 2016.
- [11] I. Dinov, K. Lozev, P. Petrosyan, Z. Liu, P. Eggert, J. Pierce, A. Zامanyan, S. Chakrapani, J. Van Horn, D. S. Parker et al., "Neuroimaging study designs, computational analyses and data provenance using the loni pipeline," *PloS one*, vol. 5, no. 9, p. e13070, 2010.
- [12] A. Redolfi, R. McClatchey, A. Anjum, A. Zijdenbos, D. Manset, F. Barkhof, C. Spenger, Y. Legré, L.-O. Wahlund, C. B. di San Pietro et al., "Grid infrastructures for computational neuroscience: the neugrid example," *Future Neurology*, vol. 4, no. 6, pp. 703--722, 2009.
- [13] Y. Halchenko, M. Hanke, and V. Alexeenko, "Neurodebian: an integrated, community-driven, free software platform for physiology," in *Proceedings of The Physiological Society*. The Physiological Society, 2014.
- [14] M. Minervini, C. Rusu, M. Damiano, V. Tucci, A. Bifone, A. Gozzi, and S. A. Tsiftaris, "Large-scale analysis of neuroimaging data on commercial clouds with content-aware resource allocation strategies," *International Journal of High Performance Computing Applications*, p. 1094342013519483, 2014.
- [15] M. Minervini, M. Damiano, V. Tucci, A. Bifone, A. Gozzi, and S. A. Tsiftaris, "Mouse neuroimaging phenotyping in the cloud," in *Image Processing Theory, Tools and Applications (IPTA), 2012 3rd International Conference on*. IEEE, 2012, pp. 55--60.
- [16] K. Gorgolewski, T. Auer, V. Calhoun, C. Craddock, S. Das, E. Duff, G. Flandin, S. Ghosh, T. Glatard, Y. Halchenko et al., "The brain imaging data structure, a format for organizing and describing outputs of neuroimaging experiments."
- [17] J. L. Teeters, K. Godfrey, R. Young, C. Dang, C. Friedsam, B. Wark, H. Asari, S. Peron, N. Li, A. Peyrache et al., "Neurodata without borders: creating a common data format for neurophysiology," *Neuron*, vol. 88, no. 4, pp. 629--634, 2015.

- 1  
2  
3  
4  
5 [18] R. D. Vincent, A. Janke, J. G. Sled, L. Baghdadi, P. Neelin, and A. C. Evans, "Minc 2.0: a modality independent format for multidimensional medical images," in 10th Annual Meeting of the Organization for Human Brain Mapping, vol. 2003, 2004, p. 2003.
- 6  
7  
8 [19] J. Watson, "Virtualbox: bits and bytes masquerading as machines," Linux Journal, vol. 2008, no. 166, p. 1, 2008.
- 9  
10 [20] M. Rosenblum, "Vmware's virtual platform™," in Proceedings of hot chips, vol. 1999, 1999, pp. 185--196.
- 11  
12 [21] E. A. Brewer, "Kubernetes and the path to cloud native," in Proceedings of the Sixth ACM Symposium on Cloud Computing. ACM, 2015, pp. 167--167.
- 13  
14 [22] "Binder," <http://mybinder.org/>, accessed: 2016-09-10.
- 15  
16 [23] T. Sherif, P. Rioux, M.-E. Rousseau, N. Kassis, N. Beck, R. Adalat, S. Das, T. Glatard, and A. C. Evans, "Cbrain: a web-based, distributed computing platform for collaborative neuroimaging research," Recent Advances and the Future Generation of Neuroinformatics Infrastructure, p. 102, 2015.
- 17  
18 [24] P. Di Tommaso, M. Chatzou, P. P. Baraja, and C. Notredame, "A novel tool for highly scalable computational pipelines," 2014.
- 19  
20 [25] S. Krishnan and J. L. U. Gonzalez, "Google compute engine," in Building Your Next Big Thing with Google Cloud Platform. Springer, 2015, pp. 53--81.
- 21  
22 [26] "Microsoft azure: Cloud computing platform and services," <https://azure.microsoft.com/en-us/>, accessed: 2016-10-30.
- 23  
24 [27] D. Merkel, "Docker: lightweight linux containers for consistent development and deployment," Linux Journal, vol. 2014, no. 239, p. 2, 2014.
- 25  
26 [28] G. Kiar, W. Gray Roncal, D. Mhembere, E. Bridgeford, R. Burns, and J. Vogelstein, "ndmg: Neurodata's mri graphs pipeline," Aug. 2016. [Online]. Available: <http://dx.doi.org/10.5281/zenodo.60206>
- 27  
28 [29] M. Jenkinson, P. Bannister, M. Brady, and S. Smith, "Improved optimization for the robust and accurate linear registration and motion correction of brain images," Neuroimage, vol. 17, no. 2, pp. 825--841, 2002.
- 29  
30 [30] E. Garyfallidis, M. Brett, B. Amirbekian, A. Rokem, S. Van Der Walt, M. Descoteaux, and I. Nimmo-Smith, "Dipy, a library for the analysis of diffusion mri data," Frontiers in neuroinformatics, vol. 8, p. 8, 2014.
- 31  
32 [31] D. Mhembere, W. G. Roncal, D. Sussman, C. E. Priebe, R. Jung, S. Ryman, R. J. Vogelstein, J. T. Vogelstein, and R. Burns, "Computing scalable multivariate glocal invariants of large (brain-) graphs," in Global Conference on Signal and Information Processing (GlobalSIP), 2013 IEEE. IEEE, 2013, pp. 297--300.
- 33  
34 [32] X.-N. Zuo, J. S. Anderson, P. Bellec, R. M. Birn, B. B. Biswal, J. Blautzik, J. C. Breitner, R. L. Buckner, V. D. Calhoun, F. X. Castellanos et al., "An open science resource for establishing reliability and reproducibility in functional connectomics," Scientific data, vol. 1, p. 140049, 2014.
- 35  
36 [33] R. C. Craddock, S. Jbabdi, C.-G. Yan, J. T. Vogelstein, F. X. Castellanos, A. Di Martino, C. Kelly, K. Heberlein, S. Colcombe, and M. P. Milham, "Imaging human connectomes at the macroscale," Nature methods, vol. 10, no. 6, pp. 524--539, 2013.
- 37  
38 [34] B. A. Landman, A. J. Huang, A. Gifford, D. S. Vikram, I. A. L. Lim, J. A. Farrell, J. A. Bogovic, J. Hua, M. Chen, S. Jarso et al., "Multi-parametric neuroimaging reproducibility: a 3-t resource study," Neuroimage, vol. 54, no. 4, pp. 2854--2866, 2011.
- 39  
40 [35] K. J. Gorgolewski, F. Alfaro-Almagro, T. Auer, P. Bellec, M. Capota, M. Chakravarty, N. W. Churchill, R. C. Craddock, G. Devenyi, A. Eklund, O. Esteban, G. Flandin, S. Ghosh, J. S. Guntupalli, M. Jenkinson, A. Keshavan, G. Kiar, P. R. Raamana, D. Raffelt, C. J. Steele, P.-O. Quirion, R. E. Smith, S. Strother, G. Varoquaux, T. Yarkoni, Y. Wang, and R. Poldrack, "Bids apps: Improving ease of use, accessibility and reproducibility of neuroimaging data analysis methods," bioRxiv, 2016. [Online]. Available: <http://biorxiv.org/content/early/2016/10/05/079145>
- 41  
42 [36] X.-z. J. Luo, D. N. Kennedy, and Z. Cohen, "Neuroimaging informatics tools and resources clearinghouse (nitrc) resource announcement," Neuroinformatics, vol. 7, no. 1, pp. 55--56, 2009. [Online]. Available: <http://dx.doi.org/10.1007/s12021-008-9036-8>
- 43  
44 [37] J. D. Van Horn and A. W. Toga, "Is it time to re-prioritize neuroimaging databases and digital repositories?" Neuroimage, vol. 47, no. 4, pp. 1720--1734, 2009.
- 45  
46  
47  
48  
49  
50  
51  
52  
53  
54  
55  
56  
57  
58  
59  
60  
61  
62  
63  
64  
65

- 1  
2  
3  
4  
5 [38] S. Das, A. P. Zijdenbos, D. Vins, J. Harlap, and A. C. Evans, "Loris: a web-based data management system  
6 for multi-center studies," *Frontiers in neuroinformatics*, vol. 5, p. 37, 2012.
- 7 [39] R. Burns, K. Lillaney, D. R. Berger, L. Grosenick, K. Deisseroth, R. C. Reid, W. G. Roncal, P. Manavalan, D. D.  
8 Bock, N. Kasthuri et al., "The open connectome project data cluster: scalable analysis and vision for high-  
9 throughput neuroscience," in *Proceedings of the 25th International Conference on Scientific and Statistical  
10 Database Management*. ACM, 2013, p. 27.
- 11 [40] J. T. Vogelstein, K. Amunts, A. Andreou, D. Angelaki, G. Ascoli, C. Bargmann, R. Burns, C. Cali, F. Chance,  
12 M. Chun, G. Church, H. Cline, T. Coleman, S. de La Rochefoucauld, W. Denk, A. Belén Elgoyhen, R. E. Cum-  
13 mings, A. Evans, K. Harris, M. Hausser, S. Hill, S. Inverso, C. Jackson, V. Jain, R. Kass, B. Kasthuri, K. Kording,  
14 S. Koushika, J. Krakauer, S. Landis, J. Layton, Q. Luo, A. Marblestone, D. Markowitz, J. McArthur, B. Mensh,  
15 M. Milham, P. Mitra, P. Neskovic, M. Nicolelis, R. O'Brien, A. Oliva, G. Orban, H. Peng, A. Picchini-Schaffer,  
16 M. Picciotto, J.-B. Poline, M.-m. Poo, A. Pouget, S. Raghavachari, J. Roskams, T. Sejnowski, F. Sommer,  
17 N. Spruston, L. Swanson, A. Toga, R. J. Vogelstein, R. Yuste, A. Zador, R. Huganir, and M. Miller, "Grand  
18 Challenges for Global Brain Sciences," *ArXiv e-prints*, Aug. 2016.
- 19 [41] G. Kiar, K. Gorgolewski, D. Kleissas, W. Gray Roncal, B. Litt, B. Wandell, R. Poldrack, M. Wiener,  
20 R. Vogelstein, R. Burns, and J. Vogelstein, "Example use case of sic with the ndmg pipeline (sic:ndmg)," *GigaScience  
21 Database*, 2017. [Online]. Available: <http://dx.doi.org/10.5524/100285>  
22  
23  
24  
25  
26  
27  
28  
29  
30  
31  
32  
33  
34  
35  
36  
37  
38  
39  
40  
41  
42  
43  
44  
45  
46  
47  
48  
49  
50  
51  
52  
53  
54  
55  
56  
57  
58  
59  
60  
61  
62  
63  
64  
65



# Appendix A Reproduction Instructions

Outlined here are the required steps to reproduce both the analysis of data in the cloud, as well as the live demonstration notebook server. In the command blocks which follow, all commands preceded by a \$ should be executed. Commands which are executed in a single line but were too long to fit on the page end with \ and are carried over to lines which have been indented. Below, the assumption is that the commands are being executed on a Unix-based machine with access to a terminal. If one is working with a Windows operating system, installing a GNU environment such as Cygwin<sup>8</sup> will enable the user to have a similar experience.

## A.1 Processing Data in the Cloud

Through use of the AWS Batch tool, a scalable computing cluster is able to be launched in the cloud and jobs can be submitted to it for analysis via the command line. The process which must be followed is: create a computing environment, create a job-submitting queue, create a job definition, and finally, submit jobs to the cluster. We discuss how to accomplish each of these steps, and provide the scripts which were used for the deployment presented in this manuscript. One prerequisite for the instructions that follow is that the data in question for processing is made available at a public read- and write-able S3 bucket in the BIDS data format.

### A.1.1 Setting up an AWS Batch cluster

Following the AWS Batch<sup>9</sup> Getting Started tutorial, one can create a cloud computing cluster for themselves, establish a job-accepting queue, define jobs, and submit jobs to the queue, all within the web console. Though these operations can be done via the command line as well, they will only need to be performed once so it is not significantly advantageous to script these steps.

At each of these steps there are several decisions which must be made regarding the size of the cluster, the number of cores, what container image to use in your job definition, and more. The definitions used to setup the ndmg pipeline and cluster can be found in the SIC Github repository<sup>10</sup>.

### A.1.2 Launching jobs on the cluster

Once the cluster is live and a job definition for the ndmg pipeline has been created, jobs can start being submitted to the queue. When submitting a job to the cluster, one must first take the existing task definition for the process they are trying to run, and then override relevant portions of this definition for the desired usecase. For instance, if one wishes to run a single subject from the NKI1 dataset stored on our public S3 bucket, they may create a job submission which summarizes this<sup>11</sup>. This step can be done either from within the console or via the command line. In order to use the command line interface, one must first install the Amazon CLI tool and configure it with their user credentials to ensure that processes launched via the command line and web console are linked.

1  
2  
3  
4 If one wishes to launch many jobs at once, the ndmg package contains a script which  
5 accepts an S3 bucket, a path to the dataset on that bucket, and will then launch all of the  
6 subjects within that dataset on the previously created cluster. Currently, this functionality  
7 does not exist within the Docker container version of ndmg, as it requires supplying authen-  
8 tication information to Amazon. However, passing this information to the Docker container  
9 safely and securely is a feature which the developers hope to eventually make available. To  
10 use this script, one must have installed the ndmg package in Python, and then may type the  
11 following line from a terminal window:  
12  
13

```
14  
15 $ ndmg_cloud --bucket s3_bucket_name --bids_dir \  
16 path_on_bucket  
17
```

18 As well as receiving output to the terminal, opening the Batch web console to view that the  
19 jobs have been launched can serve as confirmation that this is completed. Once the process-  
20 ing is complete, the outputs will be pushed back to the provided S3 bucket and the results  
21 can be analyzed.  
22  
23

## 24 25 **A.2 Launching Demonstration Notebook Service**

26 The interactive SIC:ndmg notebook can be a valuable way to experience the ndmg pipeline  
27 and walk through the steps it takes, from generating graphs to plotting them and producing  
28 summary statistics. This interactive notebook is contained within its own Docker container,  
29 and automagically launches the service upon creating an instance of the container. We will  
30 walk through the brief process of launching this container on your local machine so that you  
31 may interact with it or change it yourself.  
32  
33

### 34 35 **A.2.1 Setting up Your Machine**

36 The only required setup for running locally is to install Docker. Docker has installation helpers  
37 for all operating systems available on their website<sup>12</sup>. Once Docker is installed, it is important  
38 to make sure that the port 8888 is open for Docker. In the case of Mac OS X and Linux, this  
39 should be the case automatically, but for Windows it currently must be opened through the  
40 networking options of VirtualBox.  
41  
42

### 43 44 **A.2.2 Launching the Docker container**

45 The user can launch the service with a single command from a terminal with access to Docker.  
46 This terminal is the standard terminal on Linux or Mac OS X, and can be the Powershell or  
47 provided terminal when installing Docker. The following command launches this service:  
48  
49

```
50  
51 $ git clone https://github.com/neurodata/sic ~/sic  
52 $ cd ~/sic/code/jupyter  
53 $ docker build -t neurodata/sic .  
54 $ docker run -d -p 8888:8888 neurodata/sic  
55  
56
```

57 You can interact with the demo via a web browser. Navigate to localhost:8888 in the  
58 browser of your choosing to see this service live.  
59  
60

## Appendix B Extension Instructions

As this is a living and breathing project undergoing development, changes are being made regularly. The reproduction instructions given in Appendix A will reproduce the exact results presented within this manuscript. There are several ways described below which enable staying up-to-date with the project and performing one's own analyses using this tool.

### B.1 Updating the ndmg Container

In order to achieve state-of-the-art performance from the ndmg pipeline, the version of the container being used should be updated to the latest release. In the job definition created above, specifying that the container image being used is `bids/ndmg:latest` as opposed to `bids/ndmg:v0.0.41-1`, for instance, will ensure that the most recent version of the code is being used.

### B.2 Using Your Data

The ndmg pipeline processes data according to the BIDS data specification. To use the tool with an alternate dataset, it first needs to be organized according to this specification. This can be validated using the BIDS Validator<sup>13</sup>. Once the data are organized, they can either be uploaded to an S3 bucket and processed with a command similar to that in Section A.1.2 (updating the bucket name and path to data on the bucket), or kept locally with the bucket and `remote_path` values omitted, if one wishes to run the pipeline locally.

### B.3 Changing the Parameters

All of the code for this project is open-source and resides in a Github repository<sup>14</sup>. To test the pipeline with different sets of parameters, it can be cloned and the source code can be modified directly. The repository can be cloned to the HOME directory with the following.

```
$ git clone https://github.com/neurodata/ndmg ~/ndmg
```

Once adjustments have been made and the new pipeline is ready to be tested, the package can be re-installed by executing the `setup.py` file contained within the repository.

```
$ cd ~/ndmg
$ python setup.py install
```

### B.4 Changing the Functions

Much like changing parameters, once the repository is cloned it is possible to swap out algorithms or implementations for various parts of the pipeline. Examples of tools which could be replaced include registration or tractography. Again, once this is completed, the pipeline must be re-installed prior to execution.

## Notes

<sup>1</sup>[https://www.nitrc.org/forum/forum.php?forum\\_id=3664](https://www.nitrc.org/forum/forum.php?forum_id=3664)

<sup>2</sup><https://cloud.docker.com>

<sup>3</sup>[http://fcon\\_1000.projects.nitrc.org/indi/CoRR/html/nki\\_1.html](http://fcon_1000.projects.nitrc.org/indi/CoRR/html/nki_1.html)

<sup>4</sup>Enumerated here: <http://bids-apps.neuroimaging.io/apps/>

<sup>5</sup><http://brainx.io>

<sup>6</sup><https://neurographics.net/2016/07/28/oden-2016/>

<sup>7</sup><https://goo.gl/DDMcMG>

<sup>8</sup><https://www.cygwin.com/>

<sup>9</sup><https://aws.amazon.com/batch/>

<sup>10</sup>[https://github.com/neurodata/sic/tree/master/code/ec2/batch/json\\_files](https://github.com/neurodata/sic/tree/master/code/ec2/batch/json_files)

<sup>11</sup>[https://github.com/neurodata/sic/blob/master/code/ec2/batch/json\\_files/job.json](https://github.com/neurodata/sic/blob/master/code/ec2/batch/json_files/job.json)

<sup>12</sup><https://www.docker.com/products/overview>

<sup>13</sup><http://incf.github.io/bids-validator/>

<sup>14</sup><https://github.com/neurodata/ndmg>

## Science In the Cloud (SIC): A use case in MRI Connectomics

Gregory Kiar<sup>1,2</sup>, Krzysztof J. Gorgolewski<sup>3</sup>, Dean Kleissas<sup>4</sup>, William Gray Roncal<sup>4,5</sup>, Brian Litt<sup>6,7</sup>, Brian Wandell<sup>3,8</sup>, Russel A. Poldrack<sup>3</sup>, Martin Wiener<sup>9</sup>, R. Jacob Vogelstein, Randal Burns<sup>5</sup>, Joshua T. Vogelstein<sup>1,2</sup>

Corresponding Author: Joshua T. Vogelstein [jovo@jhu.edu](mailto:jovo@jhu.edu)

### Abstract

Modern technologies are enabling scientists to collect extraordinary amounts of complex and sophisticated data across a huge range of scales like never before. With this onslaught of data, we can allow the focal point to shift from data collection to data analysis. Unfortunately, lack of standardized sharing mechanisms and practices often make reproducing or extending scientific results very difficult. With the creation of data organization structures and tools which drastically improve code portability, we now have the opportunity to design such a framework for communicating extensible scientific discoveries. Our proposed solution leverages these existing technologies and standards, and provides an accessible and extensible model for reproducible research, called "science in the cloud" (SIC). Exploiting scientific containers, cloud computing, and cloud data services, we show the capability to compute in the cloud and run a web service that enables intimate interaction with the tools and data presented. We hope this model will inspire the community to produce reproducible and, importantly, extensible results which will enable us to collectively accelerate the rate at which scientific breakthroughs are discovered, replicated, and extended.

### 1 Introduction

Neuroscience is currently in a golden age of data and computation. Through recent technological advances [1], experimentalists can now amass large amounts of high quality data across essentially all experimental paradigms and spatiotemporal scales; such data are ripe to reveal the principles of brain function and structure. In fact, many public datasets and open-access data hosting repositories are going online [2; 3].

Concurrent with this onslaught of data is a desire to run analyses, not just on data collected in a single lab, but also on other publicly available datasets. Various tools have been developed by the community which solve a wide variety of computational challenges on all types of data, enabling difficult scientific questions to be answered. With the ability to perform analyses often dependent only upon access to data and code resources, neuroscience is now more accessible, with a lower barrier to entry.

However, there is no tool or framework that enables research to be performed and communicated in a way that lends itself to easy extensibility, much less reproducibility. Currently, re-performing and extending published analyses whether through data or code is often unbearably difficult: (i) data may be closed-access; (ii) data may be organized in an ad hoc fashion; (iii) the code may be closed-source or undocumented; (iv) code may have been run with undocumented parameters and dependencies; (v) analyses may have been run with code

1  
2  
3  
4 compiled for specific hardware. These properties make validating and extending scientific claims  
5 challenging.  
6

7  
8 A focus on reproducibility is already commonplace in a variety of disciplines. In genomics,  
9 Bioboxes [4] provide a framework for reproducible and interchangeable analysis containers, and  
10 tools are exploiting scalable computing solutions and being published with reproduction  
11 instructions (see: [5; 6]). Commentaries on reproducible research provide suggestions to  
12 researchers on how to tackle the challenges that are present in their scientific settings [7; 8].  
13 While these works have accelerated reproducibility and extensibility in their fields, the methods  
14 proposed do not scale to the cloud or enable real-time interactivity, and have yet to be  
15 thoroughly applied to the burgeoning field of computational neuroscience.  
16  
17  
18

19  
20 The notion of a universally web-viewable laboratory [9] is also growing in popularity, and many  
21 initiatives have been successful in contributing to this vision. In plant biology, CyVerse [10]  
22 provides infrastructure for tools, data, and education. In neuroscience, platforms such as LONI's  
23 Pipeline [11] and neuGRID [12] alleviate the burden of managing captive computing resources  
24 and integrating them with datastores, while NeuroDebian [13] provides quick and easy access to  
25 a variety of neuroimaging tools. Leveraging the NeuroDebian platform, NITRC has encouraged a  
26 transition to the cloud by releasing an Amazon Machine Image (AMI)<sup>1</sup> preloaded with commonly  
27 used packages. In parallel, many groups have strived to breach the frontier through such efforts  
28 as developing sophisticated resource estimation-based deployment strategies [14], and these  
29 have shown the great potential for a cloud-based approach to neuroimaging [15]. Each of these  
30 projects has made valuable contributions to the progress towards accessibility and portability of  
31 neuroscience research.  
32  
33  
34

### 35 36 37 <Figure 1>

38 Figure 1: Framework for science in the cloud illustrating the six necessary components for SIC.  
39 Cloud data storage enables universal access to data products. Data organization structures  
40 enable consistent tools and user interactions across datasets. Interactive demonstrations  
41 allow users to participate in live scientific analyses. Virtualization enables tools to be deployed  
42 reliably and consistently. Deployment tools organize re- sources provided by computing  
43 platforms, and enable users to run analyses at scale. Together, these tools create a framework  
44 for discovery that is optimized for extensible science.  
45  
46  
47

48 We propose a solution to these gaps in the form of a framework which leverages publicly  
49 documented and deployable cloud instances with specific pipelines installed and configured to  
50 extend published findings: an implementation we simply term "science in the cloud," or, SIC  
51 (Latin for "thus was it written"). SIC instances have several fundamental components, as  
52 summarized in Figure 1. To address data access, we put data in the cloud. To address data  
53 organization, we utilize recently proposed data standards. To address closed source and  
54 undocumented code, we generate open-source code and interactive demonstrations. To address  
55 software and hardware dependencies, we utilize virtualization, automated deployment, and  
56 cloud computing. SIC puts these pieces together to create a computing instance launched in the  
57 cloud, designed not only for generating reproducible research, but also enabling easily accessible  
58  
59  
60  
61  
62  
63  
64  
65

1  
2  
3  
4 and extensible science for everyone. SIC is designed to minimize the bottlenecks between  
5 publication and novel discoveries; leveraging the experience of the community, we propose a  
6 solution for transitioning to a universal, and “future-proof,” deployment of software to the cloud.  
7 We introduce and document an example use case of SIC with the ndmg pipeline, thus entitled  
8 SIC:ndmg. We have developed a capability which enables users to launch a cloud instance and  
9 run a container which performs an analysis of a cohort of structural and diffusion magnetic  
10 resonance imaging scans by (i) downloading the required data from a public repository in the  
11 cloud, (ii) fully processing each subject's data to estimate a connectome for each subject's  
12 associated graph statistics, and, optionally, (iii) plot quality control figures of various multivariate  
13 graph statistics.  
14  
15  
16  
17  
18

## 19 2 Methods

20 There are six key decisions which must be made when following SIC: data storage, data  
21 organization, interactive demonstrations, virtualization, deployment, and computing. The  
22 selection made for each of these components will have a significant impact on available  
23 selections for the others. The final product will be a highly interdependent network of tools and  
24 data. Table 1 shows a summary of the selections made for each of the criteria enumerated in the  
25 previous section with rationales for the decisions. In general, the tools selected were those which  
26 provided the most command-line/Application Programming Interface (API) support for their  
27 service and had the most complete documentation or online support community, enabling setup  
28 with relative ease.  
29  
30  
31  
32

33 **Cloud Data Storage** There are several options when storing data in a publicly accessible  
34 location, such as a cloud storage service or public repositories. Depending on the nature of the  
35 data being stored, different concerns (such as privacy) must be satisfied. For instance, sensitive  
36 data (i.e. not anonymized/de-identified) requires authentication for access, whereas de-  
37 identified data does not. It is our recommendation to host de-identified data in the cloud and  
38 store linking metadata privately on HIPPA (or equivalent) compliant organization datastores.  
39 Researchers who may not wish to release their data prior to publication are encouraged to store  
40 their data with secure protocols. The datastore should also be accessible through an API, or  
41 another interface enabling developers to access the data programmatically. Depending on the  
42 desired organization, autonomy is also a valuable feature, affording the developer full control on  
43 how the data is stored, as opposed to working within the confines of an existing infrastructure.  
44 The type of virtualization (described below) used may also influence the types of shared  
45 datastores which will be natively compatible with the application. Considering the above,  
46 Amazon's S3 service was used in this SIC implementation because it satisfied all of these  
47 requirements. While Google's Cloud Engine or Microsoft Azure also satisfy these requirements,  
48 the decision to use S3 was made based upon our existing domain knowledge and familiarity with  
49 each of these systems.  
50  
51  
52  
53  
54  
55

56 **Data Organization** The newly publicly-available data then needs to be organized in  
57 accordance with a data specification which enables users to navigate the repository successfully.  
58 Such standards include both file formats, which can be interpreted by programs, as well as folder  
59  
60  
61  
62  
63  
64  
65

1  
2  
3  
4 organizations, which enable grouping of data by subject, observation, type, etc. Depending on  
5 the modality of data being used, there are different structures which can be adopted. In the case  
6 of MRI, the BIDS [16] specification is a well-documented and community-developed standard  
7 which is intuitive and allows data to be both easily read- able by humans and navigated by  
8 programs. Organizations such as "Neurodata without Borders" [17] would serve as additional  
9 options for physiology data, but are unsuitable for this application. Formats such as MINC [18]  
10 focus heavily on metadata management but less on file hierarchy, making them useful though  
11 not fully sufficient for this application. Though some standards may consider securely handling  
12 identifying information, we recommend only storing de-identified data publicly to avoid possible  
13 security risks.  
14  
15  
16  
17

### 18 <Table 1>

19 Table 1: There are six key components which must be selected for SIC. Bold indicates the  
20 selections made here, with their positive and negative qualities compared to some  
21 alternatives.  
22  
23  
24

25 **Interactive Demonstrations** To encourage use of data and the tools used to analyze it,  
26 interactive demonstrations that enable users to visualize and work with some subset of the data  
27 are extremely valuable. Various programming languages have different types of demonstration  
28 environments available which either enable full interactivity or are pre-compiled to display code  
29 and results. A popular tool for interactive development and deployment of Python code is  
30 Jupyter, and thus was the tool used here. The popularity of this tool hopefully increases the  
31 average user's familiarity with the interface, lowering the barrier to entry for interacting with  
32 SIC:ndmg. If a developer is more familiar with another programming language, there is no  
33 particular reason why one would select Jupyter over an equivalent package in R, such as R  
34 Notebook.  
35  
36  
37  
38

39 **Virtualization** Developing and distributing virtualized environments containing all neces-  
40 sary code products guarantees consistent dependencies and application setup, and therefore  
41 minimizes user effort to obtain expected performance. These virtual environments should be  
42 able to be deployed on any operating system and have minimal hardware-dependent code. A key  
43 desiderata is that the virtualization system minimizes unnecessary overhead for the application.  
44 Though it does not affect run-time performance, a repository of public machine images is an  
45 attractive feature for this model as it enables sharing configurations. Docker [27] was chosen  
46 because it satisfies these practical requirements, and the accessibility of Docker Hub enables  
47 images to be quickly found and deployed. Virtual machines such as those created in Virtual Box  
48 [19] or VMware [20] provide lots of range in terms of operating systems which can be launched  
49 and allow native access to the machine through a GUI. However, though these are great features,  
50 they are unnecessary for this application. An additional attractive feature of Docker is that  
51 translating a README file (which enumerates dependencies or installation instructions) to a  
52 Dockerfile forces developers to improve their documentation and increases the useability of their  
53 tool. Though this is certainly extra work for the developer, the process requires only knowledge  
54 of the documented Docker schema and the editing of plain-text files, which we believe to be a  
55 relatively low cost to the developer.  
56  
57  
58  
59  
60  
61  
62  
63  
64  
65



1  
2  
3  
4  
5  
6 **Deployment** Deployment platforms allow users to define a specific set of instructions that can  
7 be launched on a single machine or multiple machines simultaneously. In physical hard- ware  
8 configurations, a cluster's scheduler would play this role; in the cloud, such tools are able to take  
9 advantage of computing resources across different locations and services, and enable scaling  
10 with the amount of processing required. Middleware such as Kubernetes [21], Tutum<sup>2</sup>, or  
11 Nextflow [24] can enable a user to distribute their jobs across a cluster existing in different  
12 computing environments (i.e. separate clouds). When using a single cloud, such as Amazon or  
13 Google, native applications support managing resources efficiently. In the case of SIC:ndmg, we  
14 elected to deploy entirely in Amazon's cloud; therefore, we used Amazon's Batch to launch the  
15 pipeline distributed across multiple computing nodes, and Amazon's ECS to deploy a distributed  
16 and scalable SIC service. Tools such as CBRAIN [23], LONI [11], and MyBinder [22] also enable  
17 distributed deployment of code, but are more specialized in the requirements of the tools and  
18 services that can be launched and are thus more restrictive.  
19  
20  
21  
22

23  
24 **Computing** Cloud computing services enable users to launch customized machines with  
25 specific hardware configurations and specifications, making them versatile for different varieties  
26 and scales of analyses. The more general the hardware that can be used, the more accessible the  
27 tool is for a user to adapt and use in their own environment. Selecting the commercial cloud for  
28 deployment as opposed to data center resources enables greater accessibility and transparency  
29 to users, is more scalable, and enables parallel jobs to be run in completely isolated resources.  
30 Cloud deployments also provide consistent performance across nodes, and have a much lower  
31 start-up cost than utilizing local computing resources. Since there were no specific hardware  
32 requirements in this application, and there existed previous in-house experience with the service,  
33 Amazon's EC2 was selected in this usecase. The benefit of using EC2 is that deploying code at  
34 different scales and locations is trivially extendable, so implementations can be easily taken from  
35 prototype to deployment. Amazon's cloud enables launching computing resources based on  
36 AMIs with preinstalled dependencies, increasing the flexibility of the processes which can be  
37 launched.  
38  
39  
40  
41  
42

43 Further details of our specific implementation and methods are provided in Appendix A.  
44

### 45 46 3 Results

47 We demonstrate a working example of SIC, SIC:ndmg. The ndmg pipeline [28] is an open-source,  
48 scalable pipeline for human structural connectome estimation from diffusion and structural MR  
49 images (collectively referred to hereafter as "multimodal MRI", or M3RI for brevity). The result  
50 is a portable and easily extensible tool for scalable connectome generation. A live demonstration  
51 is presented that enables reader interaction with the pipeline at the cost of a simple URL click,  
52 and data products of the tool are presented in both the context of 'reproducibility' and  
53 'extensibility.' This tool enables quantitative structural analyses of the human brain to be  
54 performed on populations of M3RI scans, and can lead to discoveries of the relationship between  
55 brain connectivity and neurological disease.  
56  
57  
58  
59  
60  
61  
62  
63  
64  
65

### 3.1 Neuroscience as a Service

The analysis transforms "raw" M3RI data into graphs. Kiar et al., (in preparation) describes the pipeline in detail; here we provide a brief overview. The pipeline (Figure 2) consists of four main steps: registration, tensor calculation, tractography, and graph generation. Note that the choices below are made for expediency and simplicity; other choices might be beneficial depending on context. Table 2 summarizes the duration and cost of each step for a given dataset processed and stored in the cloud.

Registration in ndmg is performed in several stages using FSL [29]. First, the diffusion image is self-aligned and noise-corrected using the `eddy_correct` function. Second, the transform is computed which aligns the B0 volume of the diffusion image to the structural scan using `epi_reg`. Third, the transform between the structural image and a reference atlas is computed with `flirt`. Finally, the transforms are combined and applied to the self-aligned diffusion image. The tensor calculation and tractography steps are performed with the DiPy package [30]. A simple tensor model fits a 6-component tensor to the image, and deterministic tractography with the `EuDx` algorithm is run, producing a set of streamlines. Graph generation takes as input the fiber streamlines, and maps them to regions of interest (ROIs) defined by a pre-built parcellation (such as those packaged with FSL or generated with brain segmentation algorithms) and returns an ROI-wise connectome. An edge is added to the graph for each pair of nodes along a given fiber. The final step is computing (multivariate) graph statistics on the estimated connectomes. The statistics computed are [31]: number of non-zero edges, degree distribution, eigen sequence, locality-statistic 1, edge weight distribution, clustering coefficient, and betweenness centrality. These statistics provide insight into the structure of the brain graphs, and provide a low-dimensional feature by which the graphs for different scans can be compared to one another. To provide a preliminary quality control step, we plot the graph statistics [31] for each graph (Figure 4).

#### <Figure 2>

Figure 2: Structure of the ndmg pipeline connectome estimation. Taking as input diffusion and T1 weighted MRI, ndmg first aligns the diffusion data to a reference atlas by means of the T1 image. Tensors are then computed from the aligned diffusion volume. Fiber streamlines are generated by performing tractography on the tensors. Finally, the fibers are mapped between regions of interest (ROIs) which then become nodes in the graph.

#### <Table 2>

Table 2: Approximate cost and time breakdown per subject of the ndmg pipeline running in Amazon EC2 with data stored in S3 and computation with `m4.large` machines at spot pricing of \$0.0135 per hour (Accessed on 2017/01/04). The values were obtained by processing data from the NKI1 dataset with 40 sessions. The reader should note that Amazon S3 data I/O is not free, as it may appear, but is simply inexpensive for data this size.

## 3.2 Live Demonstration

A demonstration of SIC:ndmg is available at <http://scienceinthe.cloud/>. This SIC instance is deployed via ECS on an Amazon micro-instance which is very affordable, so it can stay online indefinitely with little cost or maintenance (\$100/year). This instance is running a Jupyter server which contains the demonstration notebook, `sic_ndmg.ipynb`. Launching the notebook pulls up an interface which resembles that of Figure 3A.

### <Figure 3>

Figure 3: States of the demonstration notebook in the cloud. A) A Jupyter notebook displaying descriptions and code snippets to be run for both connectome estimation and summary statistic computation. B) After running connectome generation, an adjacency matrix will appear to provide a visualization. C) Summary statistic computation calculates several graph features and plots them in a multipanel figure. The demonstration notebook is running version v0.0.39 of ndmg.

For demonstration purposes, a downsampled subject is used in this notebook which reduces analysis time from ~1 hr/subject/core to ~3 min/subject/core. The ndmg pipeline has two levels of analysis: graph generation and summary statistic computation. Graph generation is the process of turning diffusion and structural MR images into a connectome (i.e. brain graph), and the summary statistic computation produces a graph of several graph features on each produced connectome and plots them together. Running through the notebook (Figure 3A) chronologically will produce the brain graph, display the graph (Figure 3B), compute summary statistics (Figure 3C), and then plot the statistics.

## 3.3 Reproducible Results

In addition to the live demonstration, SIC:ndmg was used to process the NKI1 [32] dataset consisting of 40 M3R scans. Instructions on setting up a cluster and running this analysis can be found in Appendix A. The NKI1 dataset is made publicly available through CORR [32], but has been organized in accordance to the BIDS [16] specification and re-hosted on our public S3 bucket, `mrneurodata`. The dataset consists of MPRAGE, DWI, and fMRI scans, where each subject has been scanned at least twice for each modality. More information about the subjects in this dataset and the scanning parameters used can be found on the CORR website<sup>3</sup>.

### < Figure 4 >

Figure 4: Running SIC:ndmg on the NKI1 dataset produces plots of graph statistics. Shown in order from left to right starting in the top row are betweenness centrality distribution, clustering coefficient distribution, degree distribution, edge weight distribution, eigen sequence, number of non-zero edges, and the locality statistic-1 distribution of the graphs. The displayed summary statistics were computed on the graphs generated with the Desikan parcellation, using the `bids/ndmg:v0.0.41-2` Docker image.

Running the Docker-hosted scientific container `bids/ndmg:v0.0.41-2` on the NKI1 dataset produced Figure 4, costing under \$1, as is summarized in Table 2. Table 3 summarizes the

1  
2  
3  
4 parameters used as inputs to SIC:ndmg to generate the graphs. Figure 4 provides insight into the  
5 variance of the dataset through a variety of different metrics. According to published work on  
6 these summary statistics [31], this dataset and pipeline combination produces expected results.  
7 A key benefit of this visualization is that it has high information density, showing us distributions  
8 for a variety of features for a large number of graphs, as opposed to more common 1-dimensional  
9 features [33]. This figure was produced by the parameters summarized in Table 4.

10  
11  
12  
13 The demonstration in the previous section executed the exact same pipeline that was used to  
14 generate Figure 4. The sole difference between execution of the demonstration and this  
15 implementation -- aside from the data being processed -- is the specific Docker container being  
16 used. The reason for this difference is that the demonstration is required to run as a web service,  
17 so additional packages and setup are required.

20  
21 **< Table 3 >**

22 Table 3: Command line arguments for connectome generation

23  
24  
25 **< Table 4 >**

26 Table 4: Command line arguments for summary statistic computation.

27  
28  
29 **3.4 Extensible Results**

30 A crucial property of SIC is the simplicity it affords users to perform extensible science. Ex-  
31 tensibility in this context can occur on several levels, including changing or adding (i) data, (ii)  
32 analyses, or (ii) visualizations. Figure 5 shows an example of such extensibility. A different  
33 dataset, the KKI2009 dataset [34], was processed using modified code, plotting the degree  
34 distribution on a log scale, with an additional plot added for cumulative variance analysis. The  
35 container used for this analysis on Docker hub is bids/ndmg:v0.0.41-2. Further details and  
36 instructions about how to extend SIC:ndmg specifically are available in Appendix B.

37  
38  
39  
40  
41 **4 Discussion**

42 Though the exemplar application used to demonstrate the value of SIC was the one-click ndmg  
43 pipeline, the framework is not restricted to this tool, or even one-click tools at all. For instance,  
44 a recent manuscript presented the notion of BIDS Apps [35]: containerized neuroimaging  
45 applications which operate on data stored in the BIDS data structure. These apps<sup>4</sup> enable  
46 complex workflows to be executed, often taking in configuration files to allow for complicated  
47 parameter sets to be delivered more conveniently than via the command line. Such containers  
48 are a terrific usecase for SIC, and can be seamlessly interchanged with one another in a given  
49 deployment. SIC can use tools such as FreeSurfer or ANTs in certain processing steps with no  
50 software changes. Developing pipelines within the SIC framework enhances their reproducibility  
51 and the extensibility of publications using them, potentially increasing their scientific impact.

52  
53  
54  
55  
56  
57 **< Figure 5 >**

58 Figure 5: Analyses performed with code developed under the SIC framework are easily  
59 extensible. The extensions made between this plot and Figure 4 are a) using a different  
60  
61  
62  
63  
64  
65

1  
2  
3  
4 dataset, in this case KKI2009, b) adjusting existing plotting code in order to improve  
5 visualization of vertex degree in a log scale, and c) adding cumulative variance analysis of the  
6 graph. The displayed summary statistics were computed on the graphs generated with the  
7 Desikan parcellation, using the bids/ndmg:v0.0.41-2 Docker image.  
8  
9

10 The SIC framework does not need to be confined to monolithic tools and containers. With further  
11 work, this concept can be integrated into a platform in which users are able to launch a variety  
12 of analyses on a variety of datasets. The self-documenting and reproducible web-calls which  
13 launch cloud containers performing computational tasks have potential to drastically improve  
14 the feedback loop between a scientist and their peers. This enables analyses to be easily  
15 replicated and refined, thus expediting scientific discovery. Tools such as Binder [22] accomplish  
16 this beautifully for Python, but the benefits of SIC are that this model can be applied not only to  
17 any containerizable application, but big data as well.  
18  
19  
20  
21

22 The distinct advantage of using Docker for virtualization as opposed to virtual machines is the  
23 lack of both computational and data overhead. Though virtual machines can be used for pipeline  
24 deployment, they are based upon hard drive files which can bloat the host system. Virtual  
25 machines also require computational overhead to distribute processes to the host system, which  
26 Docker interfaces with directly. In many applications, virtual machines are a wise or even  
27 necessary tool of choice, though when the sole objective is the execution of a pipeline followed  
28 by termination of the environment, the benefits of minimal overhead often outweigh those of  
29 the additional features which may be available through virtual machines. Tools which aid in the  
30 deployment of virtualized environments such as Vagrant can be paired with a method of  
31 virtualization, whether Docker or otherwise, and they provide further documentation describing  
32 the process for launching an environment containing a given tool for execution.  
33  
34  
35  
36  
37

38 The selections made in SIC:ndmg regarding the six technological components highlighted above  
39 were chosen based on what the authors perceived to be most widely used and supported in the  
40 active online community. Other tools enumerated in Table 1 provide alternative features which  
41 can make SIC instances appear and run quite differently when developed separately, but  
42 ultimately provide a comparable experience for the user. For instance, the decision to store data  
43 independently from a public repository (such as NITRC [36], LONI's IDA [37], LORIS [38], or  
44 ndstore [39]) leaves the onus of data organization on the developer rather than the repository,  
45 but in either case the user is able to access the data they need. This decision in particular was  
46 made so that the developer would have complete control over their data and implementation.  
47 However, hosting data within an environment such as those listed would have the advantage of  
48 enabling use of the infrastructure already built to support these platforms, such as performing  
49 meta-analyses and tracking provenance of the data itself, and is an exciting avenue for future  
50 work. While functionality for deploying in parallel to the cloud was developed with Amazon's  
51 Batch directly for interfacing with their cloud, alternative deployment tools such as Kubernetes  
52 are attractive options, because they provide clear visualizations of running processes and process  
53 versions and would enable SIC to deploy pipelines across multiple computing clouds or clusters.  
54 Deployments making use of local datacenters as opposed to the cloud are identical in execution  
55  
56  
57  
58  
59  
60  
61  
62  
63  
64  
65

1  
2  
3  
4 to those in the cloud, once Docker (or the virtualization engine of choice) is installed on the  
5 shared resources and a scheduling framework is available.  
6

7  
8 This manuscript proposes a model for extensible and accessible development that did not strain  
9 those who have already been developing or using reproducible tools, but rather enhanced their  
10 ability to do so. Domain knowledge, such as that of Docker, is not uniform across disciplines, and  
11 this may discourage developers from complying with this methodology. However, it is our belief  
12 that the proposed framework does not require additional development beyond what already  
13 goes into creating and using a reproducible tool. For instance, in the case of Docker, a Dockerfile  
14 simply documents the instructions which are to be executed upon booting a brand-new  
15 computer and installing a given tool and its dependencies. Documenting this process is essential  
16 for developers, and many tools contain a README file describing the installation process. Once a  
17 Docker container exists, the process of re-executing and testing these instructions often requires  
18 far fewer keystrokes and ambiguity in the instructions is eliminated. There are certainly start-up  
19 costs when transitioning to new tools such as virtualization platforms, but it is our view that the  
20 gained transparency and portability within SIC greatly outweighs the costs.  
21  
22  
23  
24

25  
26 In summary, the SIC framework presents a standard of reliability and extensibility for scientific  
27 data distribution and analysis. SIC is an important building block towards a global scientific  
28 community, regardless of scientific discipline, and provides a practical implementation of the  
29 idiom that science is done by "standing on the shoulders of giants."  
30  
31

## 32 33 Acknowledgements

34 This project stemmed from a sequence of three different initiatives. First, the Global Brain  
35 Workshop<sup>5</sup> brought together a collection of 60+ scientists who converged on a set of grand  
36 challenges for global brain sciences. There was universal agreement that a global framework [40]  
37 would be instrumental in transitioning neuroscience from a data deluge to a data delight. Then,  
38 at the Open Data Ecosystem for Neurosciences<sup>6</sup>, the working group on reproducibility decided  
39 that an example of a reproducible and extensible framework would be highly informative for  
40 ourselves and the greater community. Finally, the inaugural Stanford Center for Reproducible  
41 Neuroscience Coding Sprint<sup>7</sup> brought leaders in neuroimaging from around the globe to chart a  
42 path forward with standardizing a process for containerizing both open- and closed-source tools  
43 [35].  
44  
45  
46  
47  
48

## 49 Affiliations

50  
51 <sup>1</sup>Department of Biomedical Engineering, Johns Hopkins University, Baltimore, MD, USA.

52 <sup>2</sup>Center for Imaging Science, Johns Hopkins University, Baltimore, MD, USA.

53 <sup>3</sup>Department of Psychology, Stanford University, Stanford, CA, USA.

54 <sup>4</sup>Johns Hopkins University Applied Physics Lab, Columbia, MD, USA.

55 <sup>5</sup>Department of Computer Science, Johns Hopkins University, Baltimore, MD, USA.

56 <sup>6</sup>Department of Bioengineering, University of Pennsylvania, Philadelphia, PA, USA.  
57  
58  
59  
60  
61  
62  
63  
64  
65

1  
2  
3  
4 <sup>7</sup>Department of Neurology, Hospital of the University of Pennsylvania, Philadelphia, PA, USA.  
5 <sup>8</sup>Center for Cognitive and Neurobiological Imaging, Stanford University, Stanford, CA, USA.  
6 <sup>9</sup>Department of Psychology, George Mason University, Fairfax, VA, USA.  
7  
8  
9

## 10 Availability of supporting source code and requirements

11 **Project name** Science in the Cloud  
12 **Project home page** <http://scienceinthe.cloud>  
13 **Operating system(s)** Platform independent  
14 **Programming languages** Python, Docker, Bash  
15 **Other requirements** Docker, AWS credentials  
16 **License** Apache 2.0  
17  
18  
19  
20

## 21 Availability of Supporting Data

22 Snapshots of code can be found in the GigaScience repository, GigaDB [41].  
23  
24

## 25 Declarations

26  
27 **Competing Interests** The authors declare no competing interests in this manuscript.  
28 **Abbreviations** Amazon Machine Image (AMI), Application Programming Interface (API),  
29 Brain Imaging Data Structure (BIDS), Multimodal Magnetic Resonance Imaging (M3RI),  
30 Neurodata Without Borders(NWB), Science in the Cloud (SIC)  
31 **Funding** The authors would like to graciously thank: NIH, NSF, DARPA, IARPA, Johns Hop-  
32 kins University, and the Kavli Foundation for their support. Specific award information can be  
33 found at <https://neurodata.io/about>.  
34  
35  
36  
37

## 38 References

- 39 [1] S.Grillner et al., "Worldwide initiatives to advance brain research," Nature  
40 Neuroscience, vol.19, no.9, pp. 1118--1122, 2016.  
41 [2] R. A. Poldrack and K. J. Gorgolewski, "Making big data open: data sharing in  
42 neuroimaging," Nature Neuroscience, vol. 17, no. 11, pp. 1510--1517, 2014.  
43 [3] L. G. Kini, K. A. Davis, and J. B. Wagenaar, "Data integration: Combined imaging and  
44 electrophysiology data in the cloud," NeuroImage, vol. 124, pp. 1175--1181, 2016.  
45 [4] P. Belmann, J. Dröge, A. Bremges, A. C. McHardy, A. Sczyrba, and M. D. Barton,  
46 "Bioboxes: standardised containers for interchangeable bioinformatics software," GigaScience,  
47 vol. 4, no. 1, p. 1, 2015.  
48 [5] A. Bremges, I. Maus, P. Belmann, F. Eikmeyer, A. Winkler, A. Albersmeier, A. Pühler, A.  
49 Schlüter, and A. Sczyrba, "Deeply sequenced metagenome and metatranscriptome of a biogas-  
50 producing microbial community from an agricultural production-scale biogas plant,"  
51 GigaScience, vol. 4, no. 1, p. 1, 2015.  
52 [6] M. E. Aranguren and M. D. Wilkinson, "Enhanced reproducibility of sadi web service  
53 workflows with galaxy and docker," GigaScience, vol. 4, no. 1, p. 1, 2015.  
54 [7] S. R. Piccolo, A. B. Lee, and M. B. Frampton, "Tools and techniques for computational  
55 reproducibility," bioRxiv, p. 022707, 2015.  
56  
57  
58  
59  
60  
61  
62  
63  
64  
65

- 1  
2  
3  
4 [8] R. D. Peng, "Reproducible research in computational science," *Science*, vol. 334, no. 5  
5 6060, pp. 1226--1227, 2011.
- 6 [9] G. B. Frisoni, A. Redolfi, D. Manset, M. É. Rousseau, A. Toga, and A. C. Evans, "Virtual  
7 imaging laboratories for marker discovery in neurodegenerative diseases," *Nature Reviews*  
8 *Neurology*, vol. 7, no. 8, pp. 429-- 438, 2011.
- 9 [10] U. K. Devisetty, K. Kennedy, P. Sarando, N. Merchant, and E. Lyons, "Bringing your tools  
10 to cyverse discovery environment using docker," *F1000Research*, vol. 5, 2016.
- 11 [11] I. Dinov, K. Lozev, P. Petrosyan, Z. Liu, P. Eggert, J. Pierce, A. Zamanyan, S. Chakrapani, J.  
12 VanHorn, D. S. Parker et al., "Neuroimaging study designs, computational analyses and data  
13 provenance using the Ioni pipeline," *PloS one*, vol. 5, no. 9, p. e13070, 2010.
- 14 [12] A. Redolfi, R. McClatchey, A. Anjum, A. Zijdenbos, D. Manset, F. Barkhof, C.S penger, Y.  
15 Legré, L. O. Wahlund, C. B. di San Pietro et al., "Grid infrastructures for computational  
16 neuroscience: the neugrid example," *Future Neurology*, vol. 4, no. 6, pp. 703--722, 2009.
- 17 [13] Y. Halchenko, M. Hanke, and V. Alexeenko, "Neurodebian: an integrated, community-  
18 driven, free software platform for physiology," in *Proceedings of The Physiological Society. The*  
19 *Physiological Society*, 2014.
- 20 [14] M. Minervini, C. Rusu, M. Damiano, V. Tucci, A. Bifone, A. Gozzi, and S. A.  
21 Tsaftaris, "Large-scale analysis of neuroimaging data on commercial clouds with content-aware  
22 resource allocation strategies," *International Journal of High Performance Computing*  
23 *Applications*, 2014.
- 24 [15] M. Minervini, M. Damiano, V. Tucci, A. Bifone, A. Gozzi, and S. A. Tsaftaris, "Mouse  
25 neuroimaging phenotyping in the cloud," in *Image Processing Theory, Tools and Applications*  
26 *(IPTA), 2012 3rd International Conference on. IEEE, 2012*, pp. 55--60.
- 27 [16] K. Gorgolewski, T. Auer, V. Calhoun, C. Craddock, S. Das, E. Duff, G. Flandin, S. Ghosh, T.  
28 Glatard, Y. Halchenko et al., "The brain imaging data structure, a format for organizing and  
29 describing outputs of neuroimaging experiments."
- 30 [17] J. L. Teeters, K. Godfrey, R. Young, C. Dang, C. Friedsam, B. Wark, H. Asari, S. Peron, N. Li,  
31 A. Peyracheetal., "Neurodata without borders: creating a common data format for  
32 neurophysiology," *Neuron*, vol. 88, no. 4, pp. 629--634, 2015.
- 33 [18] R. D. Vincent, A. Janke, J. G. Sled, L. Baghdadi, P. Neelin, and A. C. Evans, "Minc 2.0: a  
34 modality independent format for multidimensional medical images," in *10th Annual Meeting of*  
35 *the Organization for Human Brain Mapping*, vol. 2003, 2004, p. 2003.
- 36 [19] J. Watson, "Virtualbox: bits and bytes masquerading as machines," *Linux Journal*, vol.  
37 2008, no. 166,p.1, 2008.
- 38 [20] M. Rosenblum, "Vmware's virtual platform," in *Proceedings of hotchips*, vol. 1999,  
39 pp.185--196.
- 40 [21] E. A. Brewer, "Kubernetes and the path to cloud native," in *Proceedings of the Sixth*  
41 *ACM Symposium on Cloud Computing. ACM, 2015*, pp. 167--167.
- 42 [22] "Binder," <http://mybinder.org/>, accessed:2016-09-10.
- 43 [23] T. Sherif, P. Rioux, M. E. Rousseau, N. Kassis, N. Beck, R. Adalat, S. Das, T. Glatard, and A.  
44 C. Evans, "Cbrain: a web-based, distributed computing platform for collaborative neuroimaging  
45 research," *Recent Advances and the Future Generation of Neuroinformatics Infrastructure*, p.  
46 102, 2015.
- 47  
48  
49  
50  
51  
52  
53  
54  
55  
56  
57  
58  
59  
60  
61  
62  
63  
64  
65



- 1  
2  
3  
4 [24] P. DiTommaso, M. Chatzou, P. P. Baraja, and C. Notredame, "A novel tool for highly  
5 scalable computational pipelines," 2014.  
6  
7 [25] S. Krishnan and J. L. U. Gonzalez, "Google compute engine," in Building Your Next Big  
8 Thing with Google Cloud Platform. Springer, 2015, pp. 53--81.  
9  
10 [26] "Microsoft azure: Cloud computing platform and services,"  
11 <https://azure.microsoft.com/en-us/>, accessed: 2016-10-30.  
12  
13 [27] D. Merkel, "Docker: lightweight linux containers for consistent development and  
14 deployment," Linux Journal, vol. 2014, no. 239, p. 2, 2014.  
15  
16 [28] G. Kiar, W. Gray Roncal, D. Mhembere, E. Bridgeford, R. Burns, and J. T. Vogelstein,  
17 "ndmg: Neurodata's mri graphs pipeline," Aug. 2016. [Online]. Available:  
18 <http://dx.doi.org/10.5281/zenodo.60206>  
19  
20 [29] M. Jenkinson, P. Bannister, M. Brady, and S. Smith, "Improved optimization for the  
21 robust and accurate linear registration and motion correction of brain images," Neuroimage,  
22 vol. 17, no. 2, pp. 825--841, 2002.  
23  
24 [30] E. Garyfallidis, M. Brett, B. Amirbekian, A. Rokem, S. Van Der Walt, M. Descoteaux, and I.  
25 Nimmo-Smith, "Dipy, a library for the analysis of diffusion mri data," Frontiers in  
26 neuroinformatics, vol. 8, p. 8, 2014.  
27  
28 [31] D. Mhembere, W. Gray Roncal, D. Sussman, C. E. Priebe, R. Jung, S. Ryman, R. J.  
29 Vogelstein, J. T. Vogelstein, and R. Burns, "Computing scalable multivariate glocal invariants of  
30 large (brain-) graphs," in Global Conference on Signal and Information Processing (GlobalSIP),  
31 2013 IEEE. IEEE, 2013, pp. 297--300.  
32  
33 [32] X.-N. Zuo, J. S. Anderson, P. Bellec, R. M. Birn, B. B. Biswal, J. Blautzik, J. C. Breitner, R. L.  
34 Buckner, V. D. Calhoun, F. X. Castellanos et al., "An open science resource for establishing  
35 reliability and reproducibility in functional connectomics," Scientific data, vol. 1, p. 140049,  
36 2014.  
37  
38 [33] R. C. Craddock, S. Jbabdi, C.-G. Yan, J. T. Vogelstein, F. X. Castellanos, A. Di Martino, C.  
39 Kelly, K. Heberlein, S. Colcombe, and M. P. Milham, "Imaging human connectomes at the  
40 macroscale," Nature methods, vol. 10, no. 6, pp. 524--539, 2013.  
41  
42 [34] B. A. Landman, A. J. Huang, A. Gifford, D. S. Vikram, I. A. L. Lim, J. A. Farrell, J. A. Bogovic,  
43 J. Hua, M. Chen, S. Jarso et al., "Multi-parametric neuroimaging reproducibility: a 3-t resource  
44 study," Neuroimage, vol. 54, no. 4, pp. 2854--2866, 2011.  
45  
46 [35] K. J. Gorgolewski, F. Alfaro-Almagro, T. Auer, P. Bellec, M. Capota, M. Chakravarty, N. W.  
47 Churchill, R. C. Craddock, G. Devenyi, A. Eklund, O. Esteban, G. Flandin, S. Ghosh, J. S.  
48 Guntupalli, M. Jenkinson, A. Keshavan, G. Kiar, P. R. Raamana, D. Raffelt, C. J. Steele, P.-O.  
49 Quirion, R. E. Smith, S. Strother, G. Varoquaux, T. Yarkoni, Y. Wang, and R. Poldrack, "Bids apps:  
50 Improving ease of use, accessibility and reproducibility of neuroimaging data analysis  
51 methods," bioRxiv, 2016. [Online]. Available: [http:  
52 //biorxiv.org/content/early/2016/10/05/079145](http://biorxiv.org/content/early/2016/10/05/079145)  
53  
54 [36] X.-z. J. Luo, D. N. Kennedy, and Z. Cohen, "Neuroimaging informatics tools and resources  
55 clearing house (nitrc) resource announcement," Neuroinformatics, vol. 7, no. 1, pp. 55--56,  
56 2009. [Online]. Available: <http://dx.doi.org/10.1007/s12021-008-9036-8>  
57  
58 [37] J. D. Van Horn and A. W. Toga, "Is it time to reprioritize neuroimaging databases and  
59 digital repositories?" Neuroimage, vol. 47, no. 4, pp. 1720--1734, 2009.  
60  
61  
62  
63  
64  
65

1  
2  
3  
4  
5  
6  
7  
8  
9  
10  
11  
12  
13  
14  
15  
16  
17  
18  
19  
20  
21  
22  
23  
24  
25  
26  
27  
28  
29  
30  
31  
32  
33  
34  
35  
36  
37  
38  
39  
40  
41  
42  
43  
44  
45  
46  
47  
48  
49  
50  
51  
52  
53  
54  
55  
56  
57  
58  
59  
60  
61  
62  
63  
64  
65

[38] S. Das, A. P. Zijdenbos, D. Vins, J. Harlap, and A. C. Evans, "Loris: a web-based data management system for multi-center studies," *Frontiers in neuroinformatics*, vol. 5, p. 37, 2012.

[39] R. Burns, K. Lillaney, D. R. Berger, L. Grosenick, K. Deisseroth, R. C. Reid, W. Gray Roncal, P. Manavalan, D. D. Bock, N. Kasthuri et al., "The open connectome project data cluster: scalable analysis and vision for high-throughput neuroscience," in *Proceedings of the 25th International Conference on Scientific and Statistical Database Management*. ACM, 2013, p. 27.

[40] J. T. Vogelstein, K. Amunts, A. Andreou, D. Angelaki, G. Ascoli, C. Bargmann, R. Burns, C. Cali, F. Chance, M. Chun, G. Church, H. Cline, T. Coleman, S. de La Rochefoucauld, W. Denk, A. Belén Elgoyhen, R. E. Cum- mings, A. Evans, K. Harris, M. Hausser, S. Hill, S. Inverso, C. Jackson, V. Jain, R. Kass, B. Kasthuri, K. Kording, S. Koushika, J. Krakauer, S. Landis, J. Layton, Q. Luo, A. Marblestone, D. Markowitz, J. McArthur, B. Mensh, M. Milham, P. Mitra, P. Neskovic, M. Nicolelis, R. O'Brien, A. Oliva, G. Orban, H. Peng, A. Picchini-Schaffer, M. Picciotto, J.-B. Poline, M.-m. Poo, A. Pouget, S. Raghavachari, J. Roskams, T. Sejnowski, F. Sommer, N. Spruston, L. Swanson, A. Toga, R. J. Vogelstein, R. Yuste, A. Zador, R. Huganir, and M. Miller, "Grand Challenges for Global Brain Sciences," *ArXiv e-prints*, Aug. 2016.

[41] G. Kiar, K. Gorgolewski, D. Kleissas, W. Gray Roncal, B. Litt, B. Wandell, R. Poldrack, M. Wiener, R. J. Vogelstein, R. Burns, and J. T. Vogelstein, "Example use case of sic with the ndmg pipeline (sic:ndmg)," *GigaScience Database*, 2017. [Online]. Available: <http://dx.doi.org/10.5524/100285>

## Appendix A Reproduction Instructions

Outlined here are the required steps to reproduce both the analysis of data in the cloud, as well as the live demonstration notebook server. In the command blocks which follow, all commands preceded by a \$ should be executed. Commands which are executed in a single line but were too long to fit on the page end with \ and are carried over to lines which have been indented. Below, the assumption is that the commands are being executed on a Unix-based machine with access to a terminal. If one is working with a Windows operating system, installing a GNU environment such as Cygwin<sup>8</sup> will enable the user to have a similar experience.

### A.1 Processing Data in the Cloud

Through use of the AWS Batch tool, a scalable computing cluster is able to be launched in the cloud and jobs can be submitted to it for analysis via the command line. The process which must be followed is: create a computing environment, create a job-submitting queue, create a job definition, and finally, submit jobs to the cluster. We discuss how to accomplish each of these steps, and provide the scripts which were used for the deployment presented in this manuscript. One prerequisite for the instructions that follow is that the data in question for processing is made available at a public read- and write-able S3 bucket in the BIDS data format.

#### A.1.1 Setting up an AWS Batch cluster

Following the AWS Batch<sup>9</sup> Getting Started tutorial, one can create a cloud computing cluster for themselves, establish a job-accepting queue, define jobs, and submit jobs to the queue, all within the web console. Though these operations can be done via the command line as well, they will only need to be performed once so it is not significantly advantageous to script these steps.

At each of these steps there are several decisions which must be made regarding the size of the cluster, the number of cores, what container image to use in your job definition, and more. The definitions used to setup the ndmg pipeline and cluster can be found in the SIC Github repository<sup>10</sup>.

#### A.1.2 Launching jobs on the cluster

Once the cluster is live and a job definition for the ndmg pipeline has been created, jobs can start being submitted to the queue. When submitting a job to the cluster, one must first take the existing task definition for the process they are trying to run, and then override relevant portions of this definition for the desired usecase. For instance, if one wishes to run a single subject from the NKI1 dataset stored on our public S3 bucket, they may create a job submission which summarizes this<sup>11</sup>. This step can be done either from within the console or via the command line. In order to use the command line interface, one must first install the Amazon CLI tool and configure it with their user credentials to ensure that processes launched via the command line and web console are linked.

If one wishes to launch many jobs at once, the ndmg package contains a script which accepts an S3 bucket, a path to the dataset on that bucket, and will then launch all of the subjects within

1  
2  
3  
4 that dataset on the previously created cluster. Currently, this functionality does not exist within  
5 the Docker container version of ndmg, as it requires supplying authentication information to  
6 Amazon. However, passing this information to the Docker container safely and securely is a  
7 feature which the developers hope to eventually make available. To use this script, one must  
8 have installed the ndmg package in Python, and then may type the following line from a  
9 terminal window:  
10

```
11  
12  
13     $ ndmg_cloud --bucket s3_bucket_name --bids_dir \  
14         path_on_bucket  
15  
16
```

17 As well as receiving output to the terminal, opening the Batch web console to view that the  
18 jobs have been launched can serve as confirmation that this is completed. Once the processing  
19 is complete, the outputs will be pushed back to the provided S3 bucket and the results can be  
20 analyzed.  
21  
22

## 23 24 A.2 Launching Demonstration Notebook Service

25 The interactive SIC:ndmg notebook can be a valuable way to experience the ndmg pipeline and  
26 walk through the steps it takes, from generating graphs to plotting them and producing  
27 summary statistics. This interactive notebook is contained within its own Docker container, and  
28 automagically launches the service upon creating an instance of the container. We will walk  
29 through the brief process of launching this container on your local machine so that you may  
30 interact with it or change it yourself.  
31  
32

### 33 34 35 A.2.1 Setting up Your Machine

36 The only required setup for running locally is to install Docker. Docker has installation helpers  
37 for all operating systems available on their website<sup>12</sup>. Once Docker is installed, it is important to  
38 make sure that the port 8888 is open for Docker. In the case of Mac OS X and Linux, this should  
39 be the case automatically, but for Windows it currently must be opened through the  
40 networking options of VirtualBox.  
41  
42

### 43 44 A.2.2 Launching the Docker container

45 The user can launch the service with a single command from a terminal with access to Docker.  
46 This terminal is the standard terminal on Linux or Mac OS X, and can be the Powershell or  
47 provided terminal when installing Docker. The following command launches this service:  
48  
49

```
50  
51     $ git clone https://github.com/neurodata/sic ~/sic  
52     $ cd ~/sic/code/jupyter  
53     $ docker build -t neurodata/sic .  
54     $ docker run -d -p 8888:8888 neurodata/sic  
55  
56
```

57 You can interact with the demo via a web browser. Navigate to localhost:8888 in the browser of  
58 your choosing to see this service live.  
59  
60  
61  
62  
63  
64  
65

## Appendix B Extension Instructions

As this is a living and breathing project undergoing development, changes are being made regularly. The reproduction instructions given in Appendix A will reproduce the exact results presented within this manuscript. There are several ways described below which enable staying up-to-date with the project and performing one's own analyses using this tool.

### B.1 Updating the ndmg Container

In order to achieve state-of-the-art performance from the ndmg pipeline, the version of the container being used should be updated to the latest release. In the job definition created above, specifying that the container image being used is bids/ndmg:latest as opposed to bids/ndmg:v0.0.41-1, for instance, will ensure that the most recent version of the code is being used.

### B.2 Using Your Data

The ndmg pipeline processes data according to the BIDS data specification. To use the tool with an alternate dataset, it first needs to be organized according to this specification. This can be validated using the BIDS Validator<sup>13</sup>. Once the data are organized, they can either be uploaded to an S3 bucket and processed with a command similar to that in Section A.1.2 (updating the bucket name and path to data on the bucket), or kept locally with the bucket and remote\_path values omitted, if one wishes to run the pipeline locally.

### B.3 Changing the Parameters

All of the code for this project is open-source and resides in a Github repository<sup>14</sup>. To test the pipeline with different sets of parameters, it can be cloned and the source code can be modified directly. The repository can be cloned to the HOME directory with the following.

```
$ git clone https://github.com/neurodata/ndmg ~/ndmg
```

Once adjustments have been made and the new pipeline is ready to be tested, the package can be re-installed by executing the setup.py file contained within the repository.

```
$ cd ~/ndmg  
$ python setup.py install
```

### B.4 Changing the Functions

Much like changing parameters, once the repository is cloned it is possible to swap out algorithms or implementations for various parts of the pipeline. Examples of tools which could be replaced include registration or tractography. Again, once this is completed, the pipeline must be re-installed prior to execution.

## Notes

<sup>1</sup>[https://www.nitrc.org/forum/forum.php?forum\\_id=3664](https://www.nitrc.org/forum/forum.php?forum_id=3664)

<sup>2</sup><https://cloud.docker.com>

<sup>3</sup>[http://fcon\\_1000.projects.nitrc.org/indi/CoRR/html/nki\\_1.html](http://fcon_1000.projects.nitrc.org/indi/CoRR/html/nki_1.html)

<sup>4</sup>Enumerated here: <http://bids-apps.neuroimaging.io/apps/>

<sup>5</sup><http://brainx.io>

<sup>6</sup><https://neurographics.net/2016/07/28/oden-2016/>

<sup>7</sup><https://goo.gl/DDMcMG>

<sup>8</sup><https://www.cygwin.com/>

<sup>9</sup><https://aws.amazon.com/batch/>

<sup>10</sup>[https://github.com/neurodata/sic/tree/master/code/ec2/batch/json\\_files](https://github.com/neurodata/sic/tree/master/code/ec2/batch/json_files)

<sup>11</sup>[https://github.com/neurodata/sic/blob/master/code/ec2/batch/json\\_files/job.json](https://github.com/neurodata/sic/blob/master/code/ec2/batch/json_files/job.json)

<sup>12</sup><https://www.docker.com/products/overview>

<sup>13</sup><http://incf.github.io/bids-validator/>

<sup>14</sup><https://github.com/neurodata/ndmg>

Table 1: There are six key components which must be selected for SIC. **Bold** indicates the selections made here, with their positive and negative qualities compared to some alternatives.

| <b>Hurdles</b>        | <b>Available Tools</b>                                                        | <b>Pros of Selection</b>                | <b>Cons of Selection</b>               |
|-----------------------|-------------------------------------------------------------------------------|-----------------------------------------|----------------------------------------|
| 1) Data Storage       | <b>S3</b> , Dropbox, Google Drive                                             | API, pay-by-usage                       | requires familiarity with Amazon tools |
| 2) Data Organization  | <b>BIDS</b> [16], NWB [17], MINC [18]                                         | documented, validator, active community | new, not yet fully adopted             |
| 3) Interactive demo's | <b>Jupyter</b> , R Notebook, Shiny                                            | versatile, accessible                   | optimized for Python                   |
| 4) Virtualization     | <b>Docker</b> , Virtualbox [19], VMware [20]                                  | lightweight, self-documented            | --                                     |
| 5) Deployment         | <b>Batch/ECS</b> , Kubernetes [21], MyBinder [22], CBRAIN [23], Nextflow [24] | no additional dependencies              | restricted to Amazon's cloud           |
| 6) Computing          | <b>EC2</b> , Google Compute Engine [25], Microsoft Azure [26]                 | scalable, flexible                      | requires technological expertise       |

Table 2: Approximate cost and time breakdown per subject of the ndmg pipeline running in Amazon EC2 with data stored in S3 and computation with m4.large machines at spot pricing of \$0.0135 per hour (Accessed on 2017/01/04). The values were obtained by processing data from the NKI1 dataset with 40 sessions. The reader should note that Amazon S3 data I/O is not free, as it may appear, but is simply inexpensive for data this size.

| <b>Operation</b>   | <b>Time per session (min)</b> | <b>Cost per session (1/100 USD)</b> |
|--------------------|-------------------------------|-------------------------------------|
| data storage       | --                            | 1.048/month                         |
| data I/O           | --                            | 0.000                               |
| <b>Total</b>       | <b>--</b>                     | <b>1.048/month</b>                  |
| registration       | 25                            | 0.563                               |
| tensor calculation | 2                             | 0.045                               |
| fiber tractography | 5                             | 0.112                               |
| graph generation   | 30                            | 0.675                               |
| <b>Total</b>       | <b>62</b>                     | <b>1.395</b>                        |



Table 3: Command line arguments for connectome generation

| <b>Parameter</b>      | <b>Value</b>     |
|-----------------------|------------------|
| data input directory  | /data/raw        |
| data output directory | /data/connectome |
| analysis level        | participant      |
| bucket name           | mrneurodata      |
| path on bucket        | NKI24            |

Table 4: Command line arguments for summary statistic computation.

| <b>Parameter</b>      | <b>Value</b>            |
|-----------------------|-------------------------|
| data input directory  | /data/connectome/graphs |
| data output directory | /data/qc                |
| analysis level        | group                   |

Figure1

# Science in the Cloud (SIC)

[Click here to download Figure sic\\_framework.pdf](#)

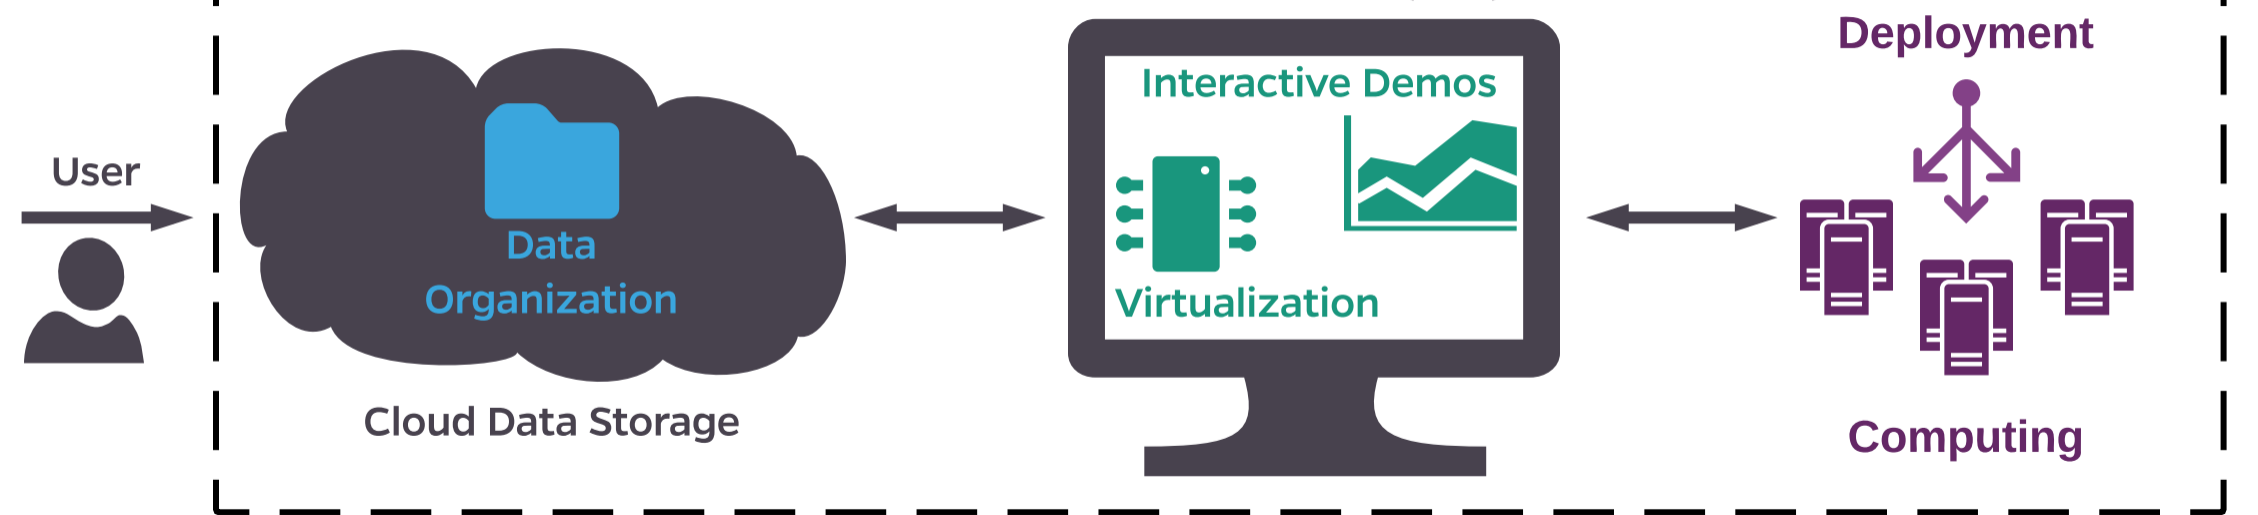

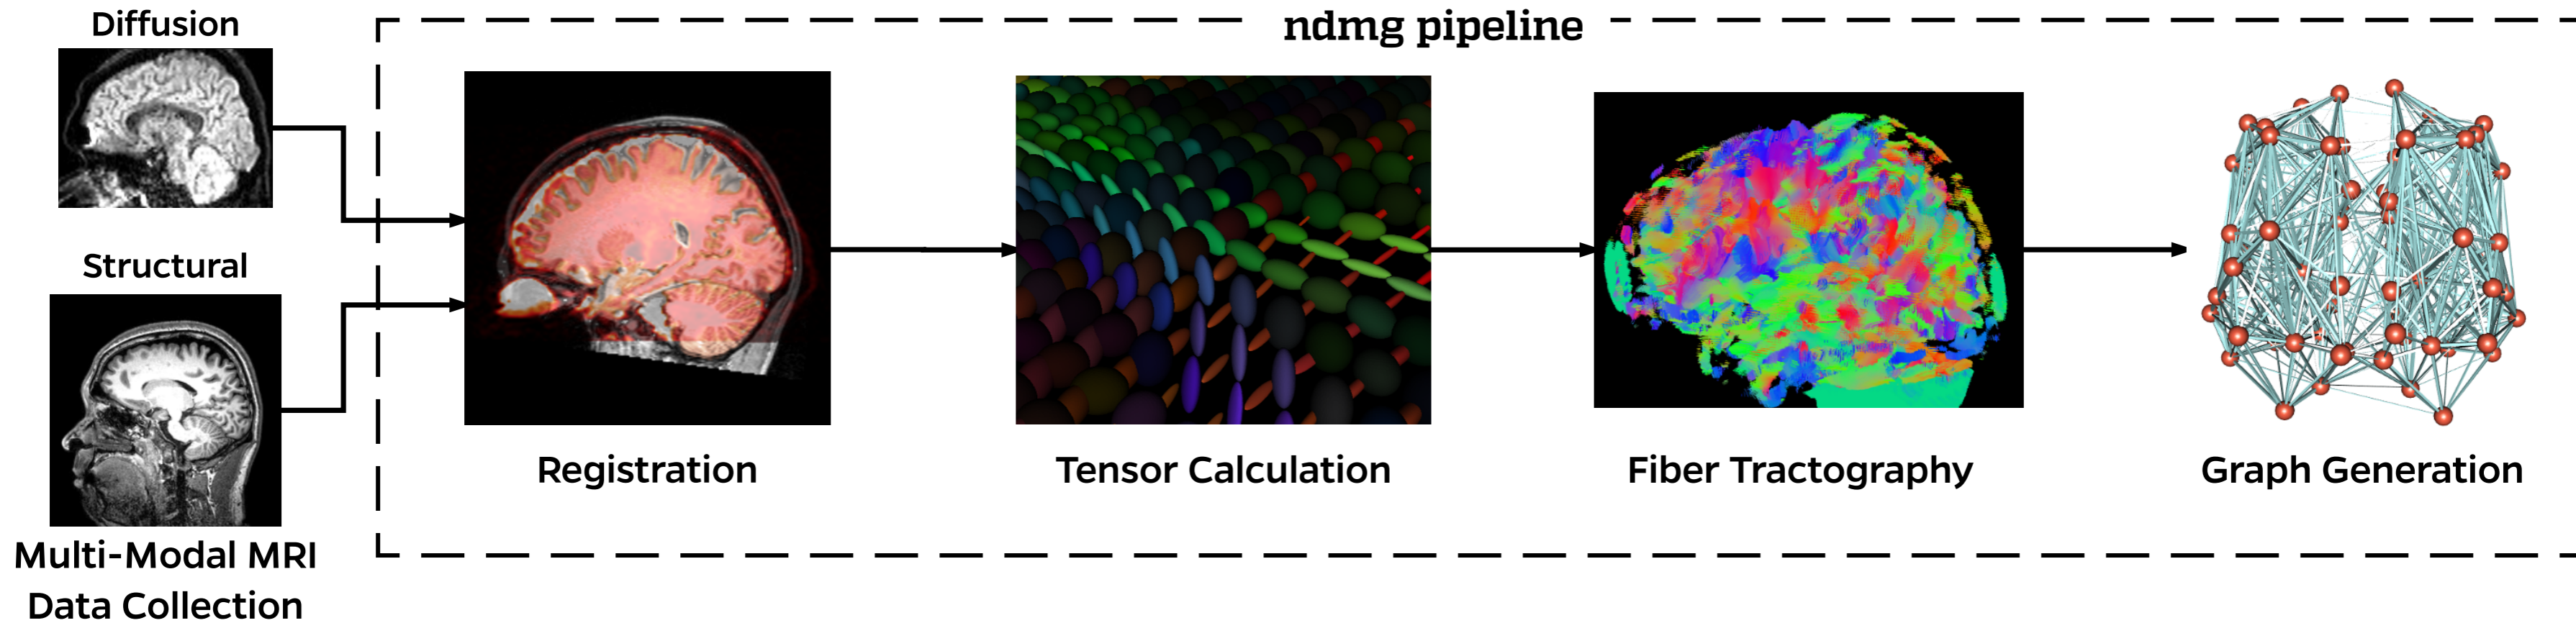

## A Demonstration Notebook

jupyter sic\_ndmg (read only)

File Edit View Insert Cell Kernel Help

Markdown

### SIC for ndmg Pipeline

ndmg contains two types of analysis: connectome generation &

### Run Connectome Generation

The first step of ndmg turns 'raw' NIfTI images into connectomes heavily downsampled for this computational demonstration, wh

## B Produced Connectome

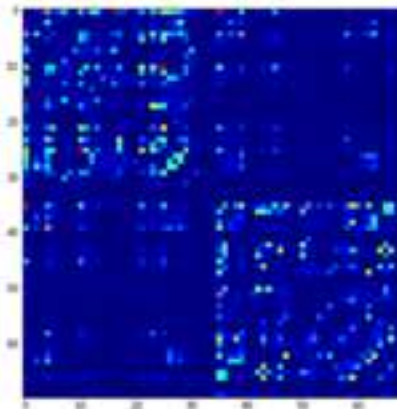

## C Summary Statistics

### Run Summary Statistic Computation

The second step of ndmg turns connectomes into quality plots of processed demo subject. This analysis should take a few seconds

by running it:

```
In [1]: %%bash
ndmg_sic /tmp/real1_demo/outputs/graphs/ \
/tmp/real1_demo/outputs/rqt/real1_demo/ \
graph

Parcellation: dwalkes_04
/tmp/real1_demo/outputs/rqt/real1_demo_04
Computing: 000
Sample Mean: 788.50
Computing: Degree Sequence
Subject Mean: 22.51
Computing: Edge Weight Sequence
Subject Mean: 42.14
Computing: Clustering Coefficient Sequence
Subject Mean: 0.49
```

## NKI1 Dataset (Desikan parcellation)

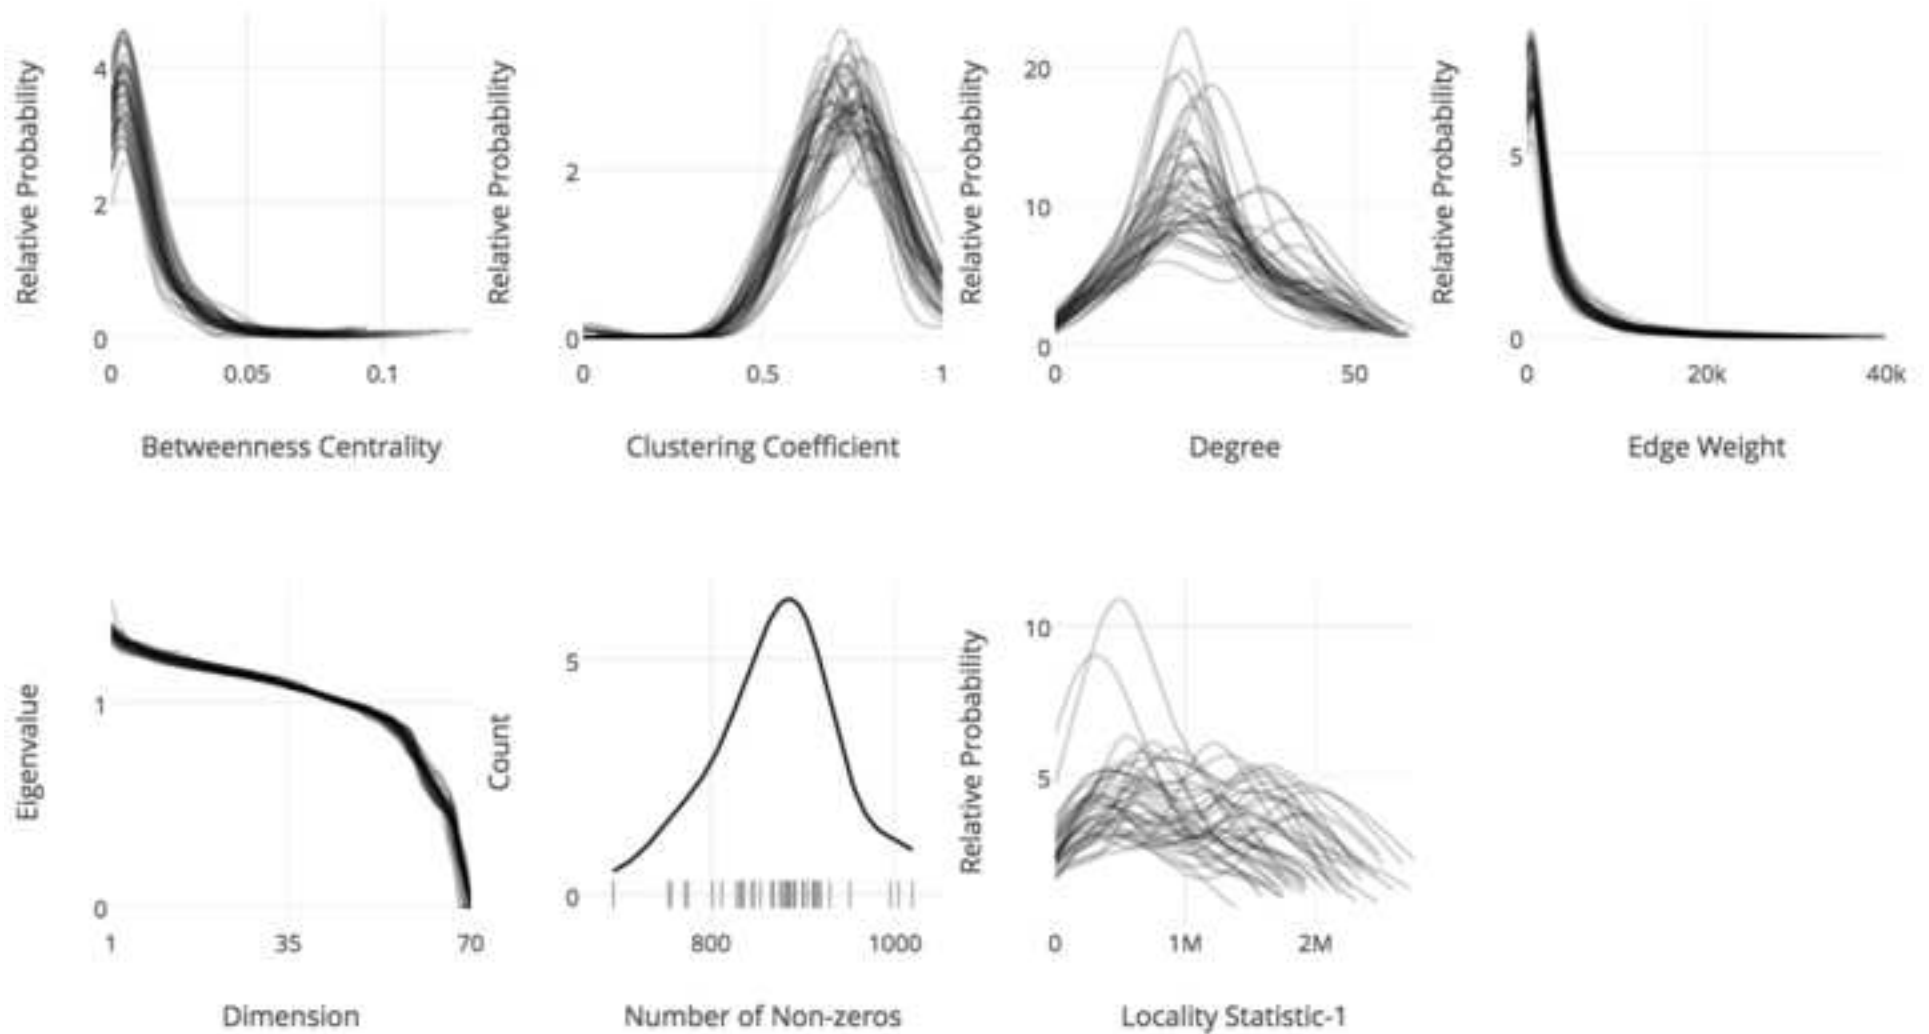

## KKI2009 Dataset (Desikan parcellation)

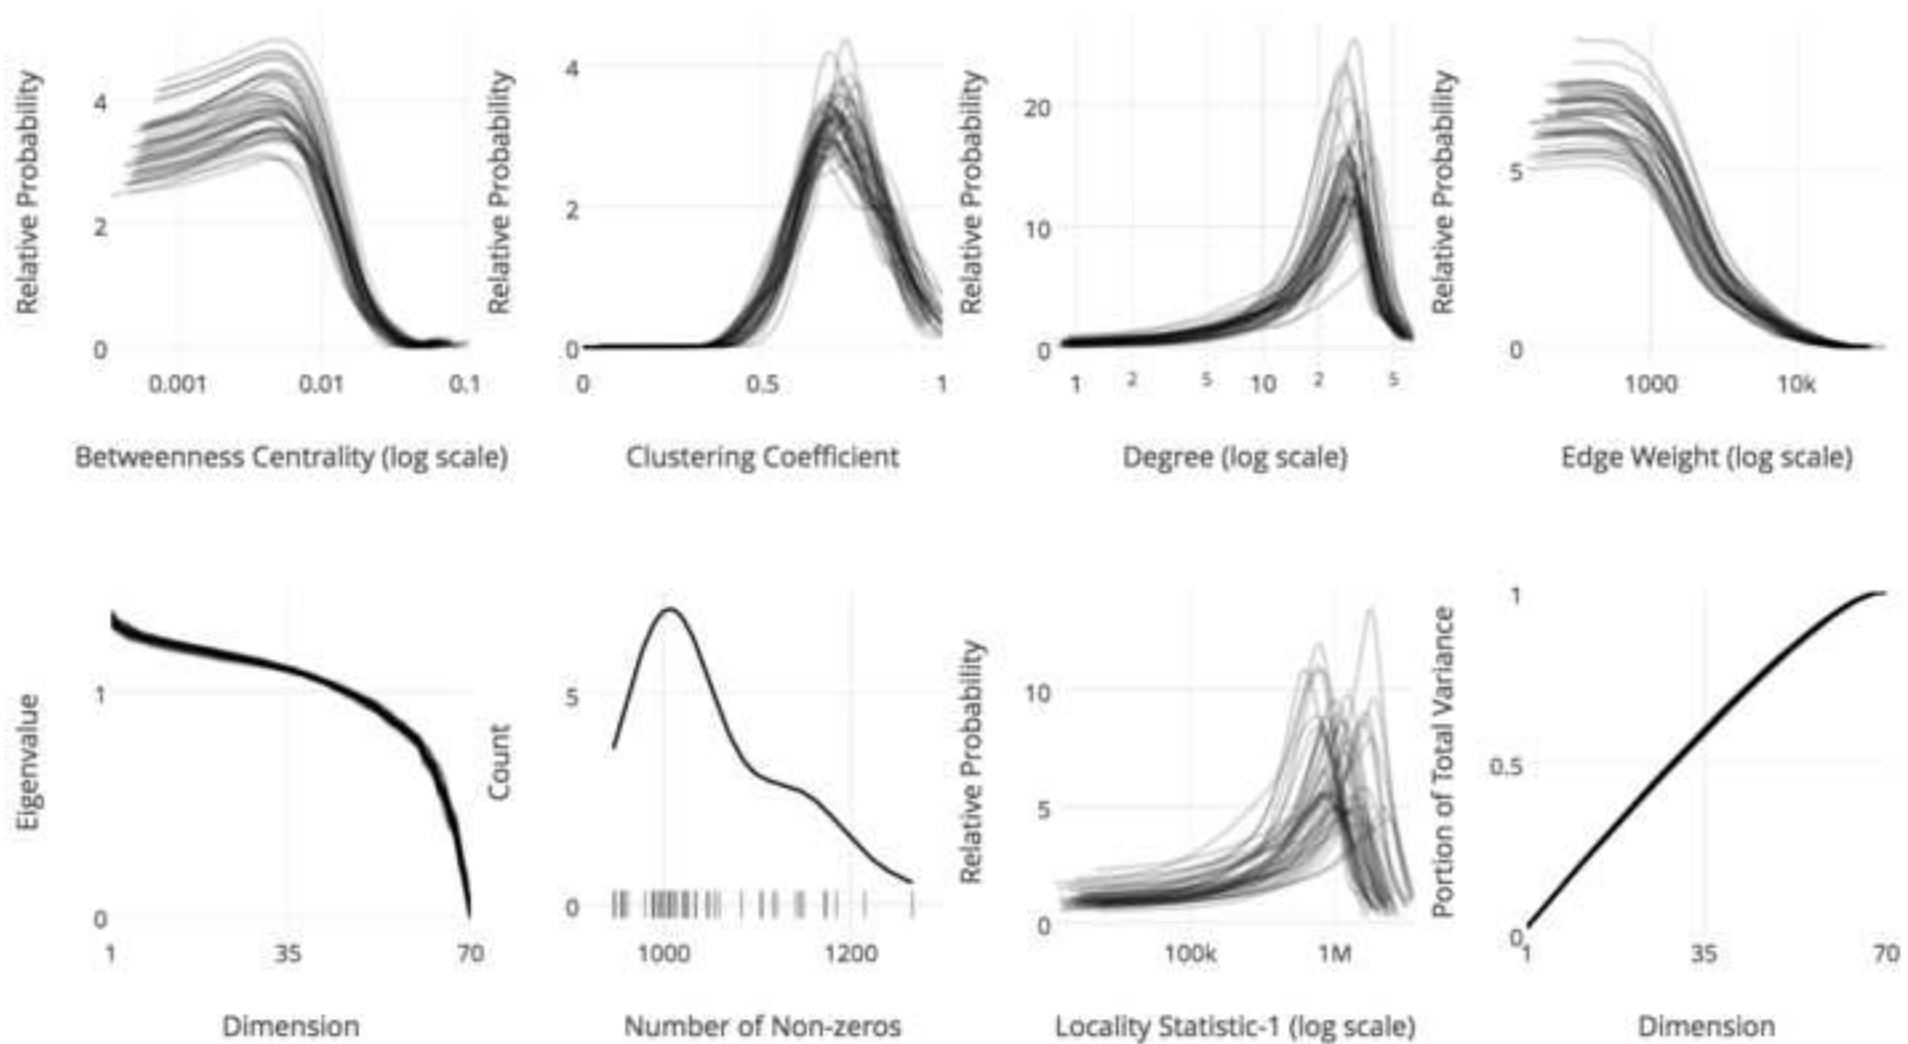

## SIC: response to reviewers

We thank all of our reviewers and the editor for their helpful feedback and insightful comments. Below, we respond to each of the comments (*italicized*) with a description of changes (regular text) and, where appropriate, excerpts from the updated manuscript (**in red**). We are grateful to have the opportunity to resubmit the new and improved version of our manuscript.

### Reviewer #1

- *Its obvious a lot of effort has gone into the work described in the manuscript so my comments relate to the future of SIC. I think that a collection of neuroscience data analyses presented using the SIC framework would be a fantastic community resource. To this end, I am wondering how the authors will promote their work so it is adopted within the neuroscience science community. I couldn't find a web site showing the work in the manuscript which might be a useful thing to have. Perhaps <http://scienceinthe.cloud> could summarise the SIC framework?*

Thank you for the very kind review and suggestion. Towards adoption, we are working closely with the developers of BIDS and BIDS Apps, for which more detail has been added to the discussion, on building a framework for one-click neuroscience analysis using a variety of tools. Regarding the website, this is a great idea, and we will certainly transform the scienceinthe.cloud web page to be a landing page for this paper once it is accepted for publication, with a link pointing to the current demo.

- *Another barrier to adoption is that the SIC framework requires expertise in Cloud storage and computing, and virtualisation software in order to share neuroscience data analyses. I am wondering if a set of Software Carpentry-like lessons (<http://softwarecarpentry.org/lessons>) on these topics geared towards SIC might be worth thinking about developing in the future which could then be used as teaching materials in training workshops?*

This is a very good point, and we certainly agree that there exists a barrier to entry. Much like Software Carpentry workshops you linked, we will be running in-person workshops at the OHBM Conference in the Data Science room this year in Vancouver, and participating in several other hackathons across the globe.

- *Fix typo on page 9 on the first line of the Discussion section: "The the..."*

Thank you, this has been corrected.

### Reviewer #2

- *Lack of a fair literature review. The way the authors present it, it appears they are the first to have attempted this. For example, what is the relevance between what the authors present and: <sources redacted to save space>. I personally find relevance to the above methods at least in terms of motivation (albeit some may have used different methods). Obviously the last two were authored by my team a few years back, on the basis of a different Python based backbone that is now defunct (PiCloud). But the*



second one (last in the list), it went even beyond that: it considered optimization of resources (type of Amazon instance) with a machine learning method that predicted resource needs for non-linear registration in a pipeline of atlas based segmentation.

This is a great point, and we agree that the papers provided as well as others we have found by looking deeper are solving similar problems in this space. We have added the below to our introduction which highlights the contribution of these and other works:

The notion of a universally web-viewable laboratory [9] is also growing in popularity, and many initiatives have been successful in contributing to this vision. In plant biology, CyVerse [10] provides infrastructure for tools, data, and education. In neuroscience platforms such as LONI's Pipeline [11] and neuGRID [12] alleviate the burden of managing captive computing resources and integrating them with datastores, while NeuroDebian [13] provides quick and easy access to a variety of neuroimaging tools. Leveraging the NeuroDebian platform, NITRC has encouraged a transition to the cloud by releasing an AMI preloaded with commonly used packages. In parallel, many groups have strived to breach the frontier through such efforts as developing sophisticated resource estimation-based deployment strategies [14], and these have shown the great potential for a cloud-based approach to neuroimaging [15]. Each of these projects has made valuable contributions to the progress towards accessibility and portability of neuroscience research.

- *I am really fond of the approach of the authors as it adopts newer technologies (containers etc) that can perhaps make such systems future-proof. I should note that some of the technologies are used also by other systems on different applications. For example, there is US based initiative called CyVerse (iPlant) which the authors could explore as well.*

Thank you for the kind remark. We have taken the time to explore some more alternatives of tools which we believe address pieces of our goal, and have added citations and descriptions to them where appropriate throughout the document. CyVerse, in particular, is mentioned in the introduction paragraph shown above.

- *lack of discussion on how the current approach can be extended to use other tools such as freesurfer, ants etc. as i am sure you are aware, the same neuroimaging tools don't work for everyone. while i agree with the idea of having standardized pipelines, the ability to evolve said pipelines (as forks) can help the system evolve and (even) be maintained. can you please expand on this.*

This is a terrific point, and we certainly acknowledge that not all tools are suitable for each task, and this approach must be accessible to a wide range of tools. The following paragraph was added to the discussion section of our manuscript.

Though the exemplar application used to demonstrate the value of SIC was the one-click ndmg pipeline, the framework is not restricted to this tool, or even one-click tools at all. For instance, a recent manuscript presented the notion of BIDS Apps [35]: containerized neuroimaging applications which operate on data stored in the BIDS data structure. These apps enable complex workflows to be executed, often taking in configuration files to allow for complicated parameter sets to be delivered more conveniently than

via the command line. Such containers are a terrific usecase for SIC, and can be seamlessly interchanged with one another in a given deployment. SIC can use tools such as FreeSurfer or ANTs in certain processing steps with no software changes. Developing pipelines within the SIC framework enhances their reproducibility and the extensibility of publications using them, potentially increasing their scientific impact.

- While the authors have cost estimates spread throughout the paper, I believe further discussion is necessary. It would help the readers to understand for a typically sized study how much does it cost to upload data, store them for X days/months, download them, and for computation. Based on our experience what was costly to store was the registration non-linear warps on the cloud and we had to keep special scripts to keep clean our data store. Thus, perhaps it is advisable that the authors to include for the pipeline in Fig 2, how much time did each step take, how much did it cost, etc. (maybe a table)?

We have added such a table to the results section, shown below, which summarizes the cost breakdown for using a typical MR dataset in this application.

Table 2: Approximate cost and time breakdown per subject of the ndmg pipeline running in Amazon EC2 with data stored in S3 and computation with m4.large machines at spot pricing of \$0.0135 per hour (Accessed on 2017/01/04). The values were obtained by processing data from the NKI1 dataset with 40 sessions. The reader should note that Amazon S3 data I/O is not free, as it may appear, but is simply inexpensive for data this size.

| <b>Operation</b>   | <b>Time per session (min)</b> | <b>Cost per session (1/100 USD)</b> |
|--------------------|-------------------------------|-------------------------------------|
| data storage       | --                            | 1.048/month                         |
| data I/O           | --                            | 0.000                               |
| <b>Total</b>       | <b>--</b>                     | <b>1.048/month</b>                  |
| registration       | 25                            | 0.563                               |
| tensor calculation | 2                             | 0.045                               |
| fiber tractography | 5                             | 0.112                               |
| graph generation   | 30                            | 0.675                               |
| <b>Total</b>       | <b>62</b>                     | <b>1.395</b>                        |

- Unfortunately, from at least how I understand the code, it appears that to do the same pipeline for the NK11 dataset (40 scans) the process is linear (ie one scan after the others). This is enforced by the comment of the authors in the discussion, related to Kubernetes, "would help enable SIC to scale well when working with big-data or running many parallel jobs." If this is true, the SIC framework loses one of the greatest aspects of cloud computing: that of scalability. The authors should comment on this, particularly as this would make a proper fit for the GigaScience journal.

Thank you for pointing out this clarification and feature which is worth emphasizing in our paper. As a result of this comment, we have worked on making parallel deployment much easier through development with AWS Batch and ECS. We have modified the language in the discussion, and updated the relevant row of Table 1. We've updated the sentence which raised this question to be the following.

While functionality for deploying in parallel to the cloud was developed with Amazon's Batch directly for interfacing with their cloud, alternative deployment tools such as Kubernetes are attractive options, because they provide clear visualizations of running processes and process versions and would enable SIC to deploy pipelines across multiple computing clouds or clusters.

- First line of discussion, there is a double the.

Thank you, it has been corrected.

### Reviewer #3

- In my vision, the main difficult to address the proposed pipeline, is the inherent complexity. For instance, while the authors propose the use of Docker containers to create easily setup scripts and data loading, in a real scenario there are two main criticisms: 1) the complexity of creating the Docker container by the research groups, for instance, considering the data scientists associated to the MRI problem may not have that knowledge; 2) to run the containers, it is still needed some technology background. Thus, the methodology and guidelines should be considered to approach the problem, and the strengths and weakness should be presented in discussion.

Thank you for this comment, as it raises a very good point. There is certainly a trade-off between complexity for the developers and as ease of use for the users. We've addressed this point by highlighting the necessary steps to produce a reproducible tool in general, and then explain the gains once turning that into a Docker contained tool, while acknowledging the cost. The paragraph below was added to the discussion.

This manuscript proposes a model for extensible and accessible development that did not strain those who have already been developing or using reproducible tools, but rather enhanced their ability to do so. Domain knowledge, such as that of Docker, is not uniform across disciplines, and this may discourage developers from complying with this methodology. However, it is our belief that the proposed framework does not require additional development beyond what already goes into creating and using a reproducible tool. For instance, in the case of Docker, a Dockerfile simply documents the instructions which are to be executed upon booting a brand-new computer and installing

a given tool and its dependencies. Documenting this process is essential for developers, and many tools contain a README file describing the installation process. Once a Docker container exists, the process of re-executing and testing these instructions often requires far fewer keystrokes and ambiguity in the instructions is eliminated. There are certainly start-up costs when transitioning to new tools such as virtualization platforms, but it is our view that the gained transparency and portability within SIC greatly outweighs the costs.

- *Data Storage: what kind of protocols should be considered? Only HTTP? If we considered to virtualize the machines, the users might want to have different access points and applied mount for instance, via NFS or CIFS. Moreover, could be another API used as for instance mount the Storage as a Volume?*

Protocols such as HTTP or volume mounting are considerations which must be made when selecting an option for data storage, and that one's data should influence this. We've updated the bulk of the Data Storage paragraph in the Methods section to the following.

Depending on the nature of the data being stored, different concerns (such as privacy) must be satisfied. For instance, sensitive data (i.e. not anonymized/de-identified) requires authentication for access, whereas de-identified data does not. It is our recommendation to host de-identified data in the cloud and store linking metadata privately on HIPPA (or equivalent) compliant organization datastores. Researchers who may not wish to release their data prior to publication are encouraged to store their data with secure protocols. The datastore should also be accessible through an API, or another interface enabling developers to access the data programmatically. Depending on the desired organization, autonomy is also a valuable feature, affording the developer full control on how the data is stored, as opposed to working within the confines of an existing infrastructure. The type of virtualization (described below) used may also influence the types of shared datastores which will be natively compatible with the application.

- *Cloud environments: do you consider to use API middleware to solve the problem of different providers There are libraries that allow to run machines from multiple clouds.*

Middleware can certainly be valuable when operating across multiple compute clouds, though it is often not necessary when working within a single cloud as providers have tools developed to interface with their service directly. We've updated the Deployment paragraph in the Methods section accordingly.

Middleware such as Kubernetes [21], Tutum, or Nextflow [24] can enable a user to distribute their jobs across a cluster existing in different computing environments (i.e. separate clouds). When using a single cloud, such as Amazon or Google, native applications support managing resources efficiently. In the case of SIC:ndmg, we elected to deploy entirely in Amazon's cloud; therefore, we used Amazon's Batch to launch the pipeline distributed across multiple computing nodes, and Amazon's ECS to deploy a distributed and scalable SIC service.

- *Docker: is proposed to run in AWS EC2 in the case study. But what are the differences between run in a local datacenter?*

Thank you for this relevant question - we have added the following sentence in the discussion which addresses how to run in local datacenters (i.e. shared resources).

Deployments making use of local datacenters as opposed to the cloud are identical in execution to those in the cloud, once Docker (or the virtualization engine of choice) is installed on the shared resources and a scheduling framework is available.

- Moreover, AWS has already a service dedicated to Docker containers. Could you consider to use this kind of tools in your approach?

Thank you for this great suggestion - we are now using two such Amazon services: Batch for distributed deployment of pipelines, and ECS for scalable deployment of web services. We have updated Table 1 (below) and the Discussion (inserted above) to reflect this.

Table 1: There are six key components which must be selected for SIC. **Bold** indicates the selections made here, with their positive and negative qualities compared to some alternatives.

| Hurdles               | Available Tools                                                               | Pros of Selection                       | Cons of Selection                      |
|-----------------------|-------------------------------------------------------------------------------|-----------------------------------------|----------------------------------------|
| 1) Data Storage       | <b>S3</b> , Dropbox, Google Drive                                             | API, pay-by-usage                       | requires familiarity with Amazon tools |
| 2) Data Organization  | <b>BIDS</b> [16], NWB [17], MINC [18]                                         | documented, validator, active community | new, not yet fully adopted             |
| 3) Interactive demo's | <b>Jupyter</b> , R Notebook, Shiny                                            | versatile, accessible                   | optimized for Python                   |
| 4) Virtualization     | <b>Docker</b> , Virtualbox [19], VMware [20]                                  | lightweight, self-documented            | --                                     |
| 5) Deployment         | <b>Batch/ECS</b> , Kubernetes [21], MyBinder [22], CBRAIN [23], Nextflow [24] | no additional dependencies              | restricted to Amazon's cloud           |
| 6) Computing          | <b>EC2</b> , Google Compute Engine [25], Microsoft Azure [26]                 | scalable, flexible                      | requires technological expertise       |

- *On the other hand, there are already tools like Totum that may facilitate the deployment of Docker containers. Could be a pre-installed machine help to deploy new containers?*

This is absolutely correct, and such machines are now used in our deployment. We mention Tutum (alternatively, Docker Cloud) as an example, and have updated the Deployment paragraph in the Methods section as in inserted above to address this comment.

- *Open standards for data: what are the standards and how they are used? It should be clarified in the manuscript.*

We apologize for a lack of clarity, and we have updated the Data Organization paragraph of the Methods section and believe the following excerpt addresses this.

The newly publicly-available data then needs to be organized in accordance with a data specification which enables users to navigate the repository successfully. Such standards include both file formats, which can be interpreted by programs, as well as folder organizations, which enable grouping of data by subject, observation, type, etc. Depending on the modality of data being used, there are different structures which can be adopted. In the case of MRI, the BIDS [16] specification is a well-documented and community-developed standard which is intuitive and allows data to be both easily readable by humans and navigated by programs. Organizations such as "Neurodata without Borders" [17] would serve as additional options for physiology data, but are unsuitable for this application. Formats such as MINC [18] focus heavily on metadata management but less on file hierarchy, making them useful though not fully sufficient for this application.

- *Did you consider several levels of security? For instance, only allow the reviewers to access the container - online available?*

In the paragraph shown above in response to the *Data Storage* question, based on this suggestion we now address the question of security, stating that the use of secure protocols enables researchers to not share their data publicly while still operating within the proposed framework.

- *What are the differences of this architecture comparing with only publishing a README with instructions? Easy for end-user, complex for developer/researcher.*

We addressed this valid concern about difficulty when responding to the earlier *complexity* question. We acknowledge there is a learning-curve cost which must be considered when switching from one method of documentation to another, but believe the benefit of removed ambiguity outweighs this cost.

- *Docker vs Vagrant? Could be a virtual machine do the same? What are the differences for the proposed pipeline? This kind of technical details should be addressed in the discussion, because in the end, the manuscript is placed as a technical research paper.*

Thank you for bringing this up - Vagrant can be valuable when used alongside Docker, and we have added the following sentences to the discussion to clarify this.

The distinct advantage of using Docker for virtualization as opposed to virtual machines is the lack of both computational and data overhead. Though virtual machines can be

used for pipeline deployment, they are based upon hard drive files which can bloat the host system. Virtual machines also require computational overhead to distribute processes to the host system, which Docker interfaces with directly. In many applications, virtual machines are a wise or even necessary tool of choice, though when the sole objective is the execution of a pipeline followed by termination of the environment, the benefits of minimal overhead often outweigh those of the additional features which may be available through virtual machines. Tools which aid in the deployment of virtualized environments such as Vagrant can be paired with a method of virtualization, whether Docker or otherwise, and they provide further documentation describing the process for launching an environment containing a given tool for execution.
